# Supplementary material for: Phospholipid remodeling is critical for stem cell pluripotency by facilitating mesenchymal-to-epithelial transition
Source: PubMed Central journal article supplement — Sci Adv. 2019 Nov 27;5(11):eaax7525. doi: 10.1126/sciadv.aax7525 (PMC6881163; doi:10.1126/sciadv.aax7525), 2019-11-27
Supplement: aax7525_SM.pdf [file aax7525_SM.pdf]

## Supplementary Materials for

### **Phospholipid remodeling is critical for stem cell pluripotency by facilitating mesenchymal-to-epithelial transition**

Yi Wu, Keshi Chen, Guangsuo Xing, Linpeng Li, Bochao Ma, Zhijuan Hu, Lifan Duan, Xingguo Liu\*

\*Corresponding author. Email: liu\_xingguo@gibh.ac.cn

Published 27 November 2019, *Sci. Adv.* **5**, eaax7525 (2019)

DOI: 10.1126/sciadv.aax7525

#### **This PDF file includes:**

Fig. S1. The CDP-Etn pathway is required for somatic cell reprogramming.

Fig. S2. Characterization of iPSCs generated from iCD1 or  $\Delta$ iCD1 and generation of *Pcyt2* knockout mESCs.

Fig. S3. The CDP-Etn pathway acceleration of MET depends on *Pebp1*.

Fig. S4. The CDP-Etn-*Pebp1* axis modulates NF- $\kappa$ B signaling to inhibit mesenchymal genes.

Table S1. Lipid species identified MEFs, mESCs, and MEFs undergoing SKO reprogramming on days 2, 4, 6, and 8.

Table S2. shRNA target sequences.

Table S3. Primers for qRT-PCR.

Table S4. Primers for CHIP-qPCR.

Figure S1

A

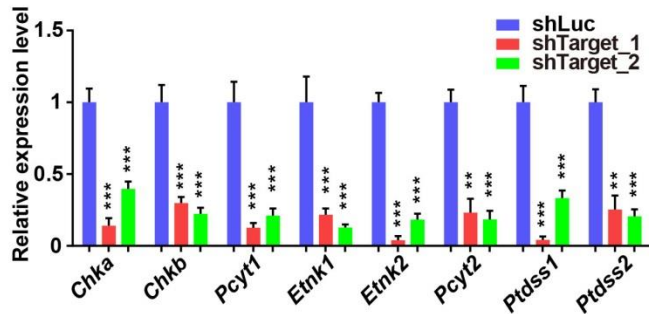

B

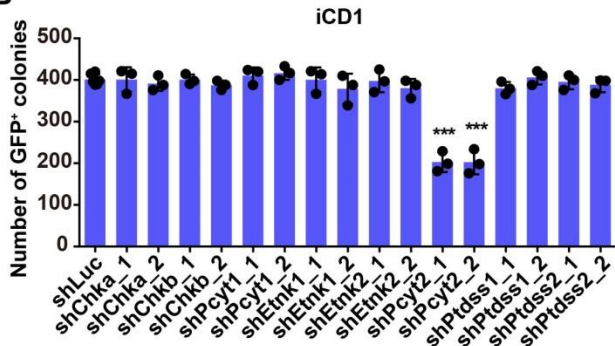

C

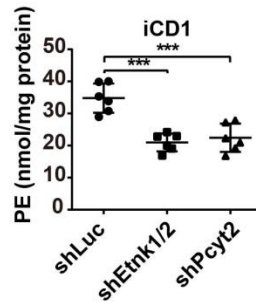

D

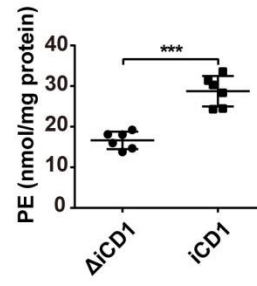

E

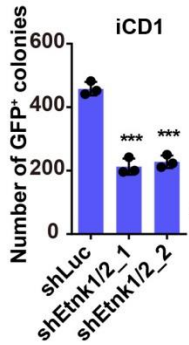

F

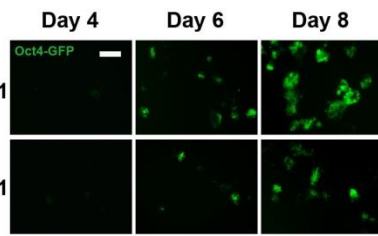

G

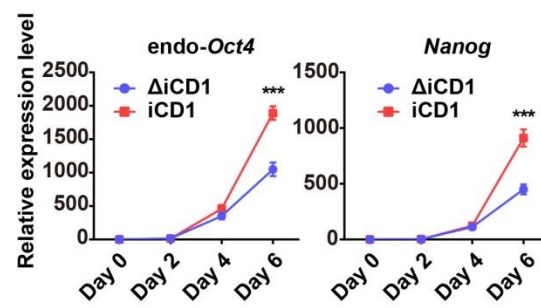

H

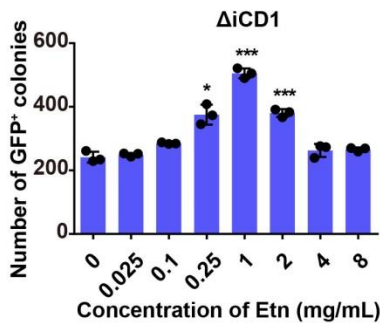

I

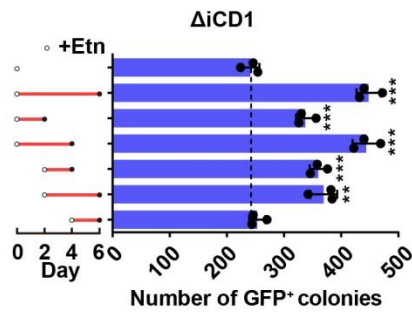

J

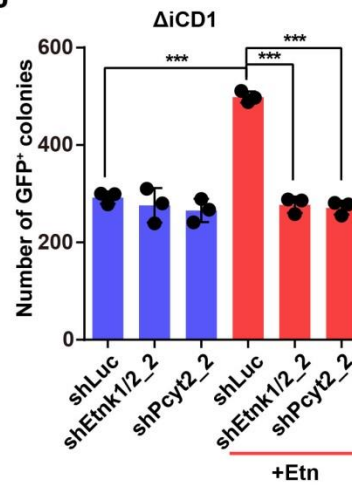

**Fig. S1. The CDP-Etn pathway is required for somatic cell reprogramming.** (A) qRT-PCR analysis of expression of genes encoding rate-limiting enzymes in phospholipid synthesis pathways in MEFs transduced with shRNAs against indicated genes (two shRNAs were used for each gene). Data are represented as mean  $\pm$  SD, n=3. \*\*P<0.01, \*\*\*P<0.001. (B) Knocking down *Pcyt2* impaired reprogramming efficiency. The numbers of *Oct4*-GFP<sup>+</sup> colonies were counted on day 6 in MEFs transduced with SKO and shRNAs against indicated genes in iCD1 medium (two shRNAs were used for each gene). shRNA against *Luciferase* (shLuc) was used as control. Data are represented as mean  $\pm$  SD, n=3. \*\*\*P<0.001. (C and D) Cellular PE levels in MEFs transduced with SKO and shEtnk1/2 or shPcyt2 in iCD1 medium on day 2. shLuc was used as control (C). Cellular PE levels in MEFs transduced with SKO in  $\Delta$ iCD1 or iCD1 medium on day 2 (D). Data are represented as mean  $\pm$  SD, n=6. \*\*\*P<0.001. (E) Simultaneous knock-down of *Etnk1* and *Etnk2* impaired reprogramming efficiency. The numbers of *Oct4*-GFP<sup>+</sup> colonies were counted on day 6 in MEFs transduced with SKO and shRNAs against indicated genes in iCD1 medium (two shRNAs were used for each gene). shLuc was used as control. Data are represented as mean  $\pm$  SD, n=3. \*\*\*P<0.001. (F) Representative *Oct4*-GFP images of MEFs transduced with SKO in  $\Delta$ iCD1 or iCD1 medium on days 4, 6 and 8. Scale bar, 250  $\mu$ m. (G) qRT-PCR analysis of endogenous pluripotency genes *Oct4* and *Nanog* in MEFs transduced with SKO in  $\Delta$ iCD1 or iCD1 medium on days 4, 6 and 8. \*\*\*P<0.001. (H) Dose-dependent effects of Etn on reprogramming. The numbers of *Oct4*-GFP<sup>+</sup> colonies were counted on day 6 in MEFs transduced with SKO in  $\Delta$ iCD1 medium supplemented with different concentrations of Etn. Data are represented as mean  $\pm$  SD, n=3. \*P<0.05, \*\*\*P<0.001. (I) Addition of Etn at the early phase of reprogramming was sufficient to achieve optimal reprogramming efficiency. The numbers of *Oct4*-GFP<sup>+</sup> colonies were counted on day 6 in MEFs transduced with SKO in  $\Delta$ iCD1 medium supplemented with Etn during different time frames as indicated. Data are represented as mean  $\pm$  SD, n=3. \*\*P<0.01, \*\*\*P<0.001. (J) Etn had no effect on reprogramming when *Etnk1/2* or *Pcyt2*

was blocked by shRNAs. The numbers of *Oct4*-GFP<sup>+</sup> colonies were counted on day 6. shLuc was used as control. Data are represented as mean  $\pm$  SD, n=3. \*\*\*P<0.001.

**Figure S2**

**A**

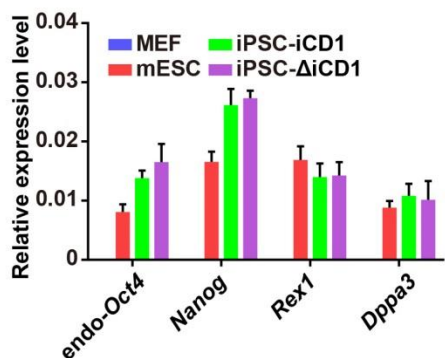

**B**

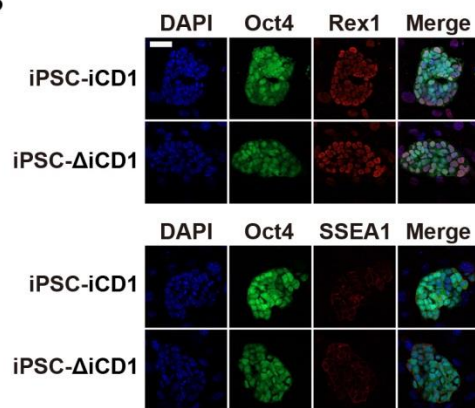

**C**

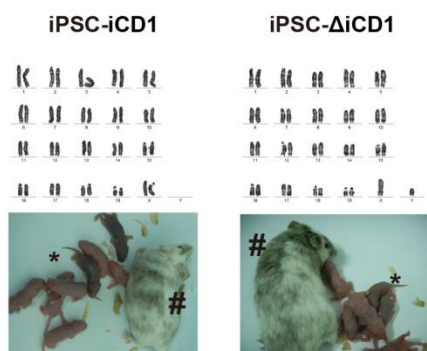

**D**

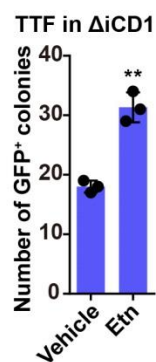

**E**

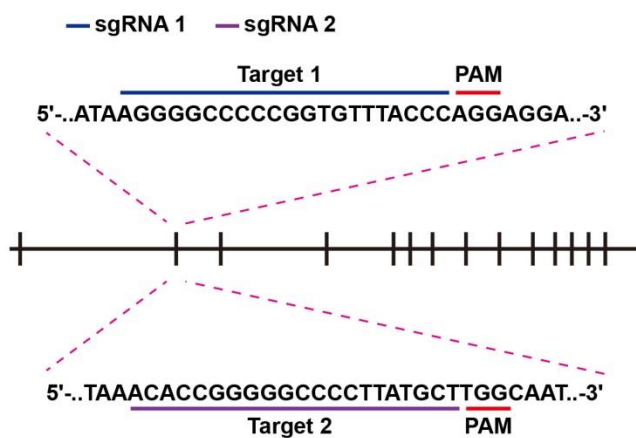

**F**

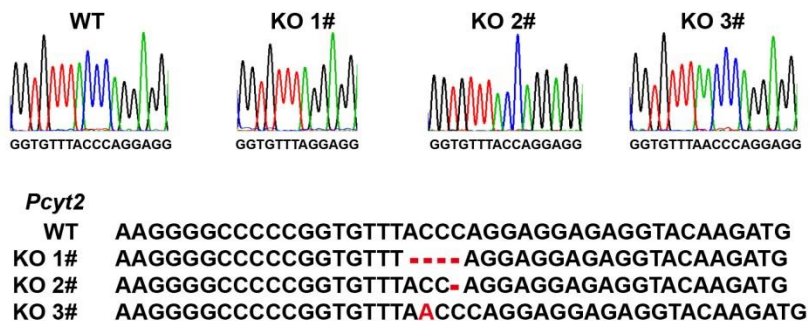

**Fig. S2. Characterization of iPSCs generated from iCD1 or  $\Delta$ iCD1 and generation of *Pcyt2* knockout mESCs.** (A) qRT-PCR analysis of activation of endogenous pluripotency genes. (B) Immunofluorescence staining (red) of pluripotency markers (Rex1 and SSEA1) in iPS colonies generated from iCD1 or  $\Delta$ iCD1. Scale bar, 100  $\mu$ m. (C) Karyotype analysis (up) of iPS colonies generated from iCD1 or  $\Delta$ iCD1. Germline transmission of chimeric mice (down) generated from iPS colonies generated from iCD1 or  $\Delta$ iCD1. #: chimeric mice; \*: germline transmission mice. (D) Supplementation of Etn promoted reprogramming efficiency of mouse tail-tip fibroblasts (TTFs). The numbers of *Oct4*-GFP<sup>+</sup> colonies were counted on day 14 in TTFs transduced with SKO with or without Etn. Data are represented as mean  $\pm$  SD, n=3. \*\*P<0.01. (E) Schematic of the two single guide RNAs (sgRNAs, blue and purple bars) designed to target *Pcyt2* loci. Protospacer adjacent motifs (PAM) are indicated by red bars. (F) Sequencing results showing three indel mutations in the *Pcyt2* knockout ESCs.

Figure S3

A

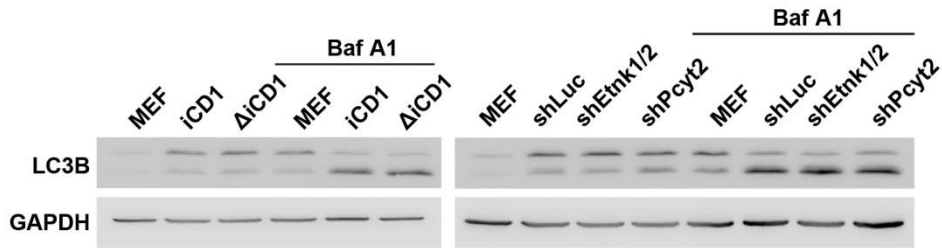

B

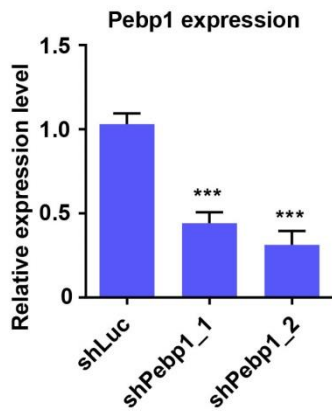

C

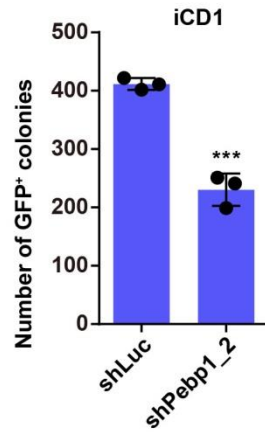

D

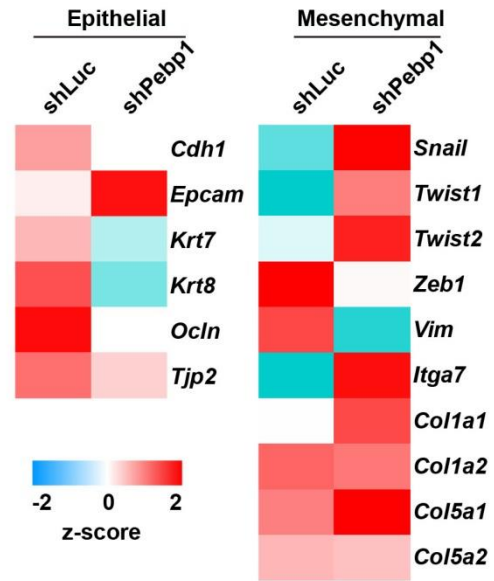

E

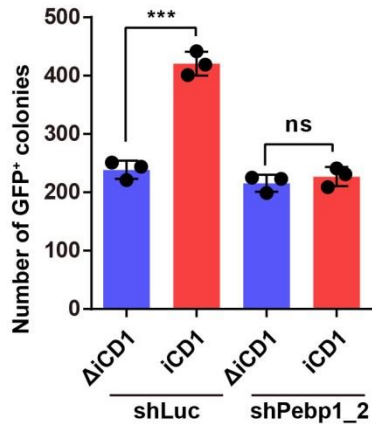

**Fig. S3. The CDP-Etn pathway acceleration of MET depends on *Pebp1*.** (A) Western blot analysis of LC3B on day 2 in MEFs transduced with SKO in  $\Delta$ iCD1 or iCD1 medium (left) and in MEFs transduced with SKO and shLuc, shEtnk1/2 or shPcyt2 in iCD1 medium (right) in the absence or presence of bafilomycin A1 (Baf A1). MEFs transfected with empty vector were used as control. (B) qRT-PCR analysis of expression of *Pebp1* in MEFs transduced with shRNAs against *Pebp1* (two shRNAs were used, shPebp1\_1 or shPebp1\_2). Data are represented as mean  $\pm$  SD, n=3. \*\*\*P<0.001. (C) *Pebp1* silencing impaired reprogramming efficiency. The numbers of *Oct4*-GFP<sup>+</sup> colonies were counted on day 6 in MEFs transduced with SKO and shLuc or shPebp1\_2. Data are represented as mean  $\pm$  SD, n=3. \*\*\*P<0.001. (D) Heatmaps showing the expression of selected epithelial (left) and mesenchymal (right) genes on day 2 in MEFs transduced with SKO and shLuc or shPebp1 in iCD1 medium. (E) The numbers of *Oct4*-GFP<sup>+</sup> colonies on day 6 in MEFs transduced with SKO and shLuc or shPebp1\_2 in  $\Delta$ iCD1 or iCD1 medium. Data are represented as mean  $\pm$  SD, n=3. \*\*\*P<0.001. ns: not significant.



Figure S4

A

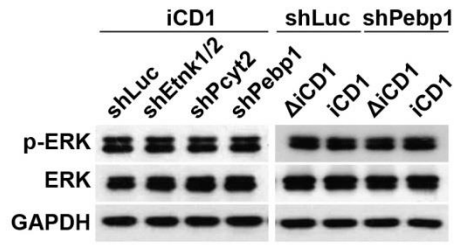

B

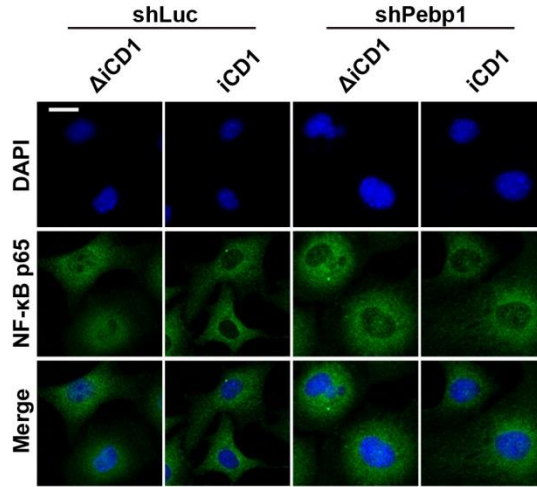

C

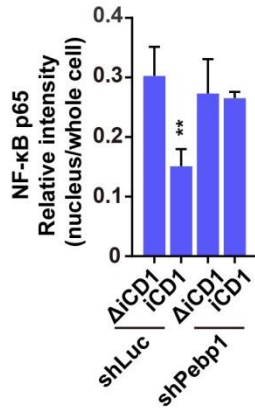

D

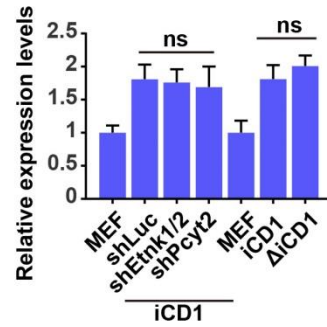

E

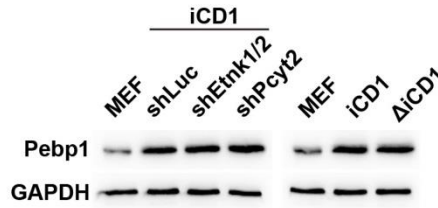

F

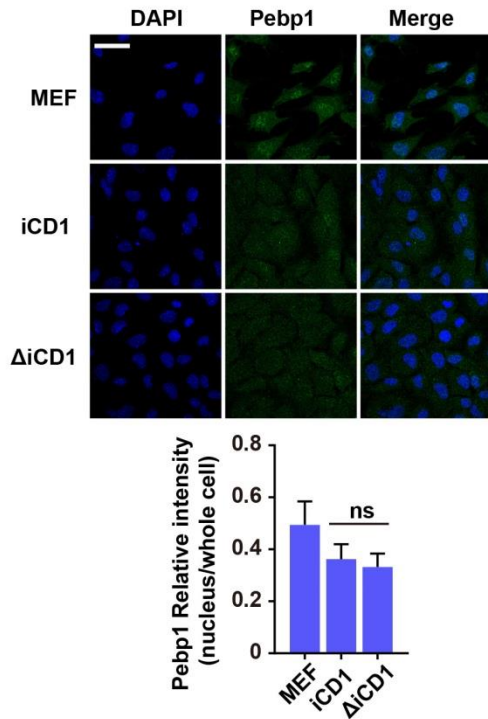

G

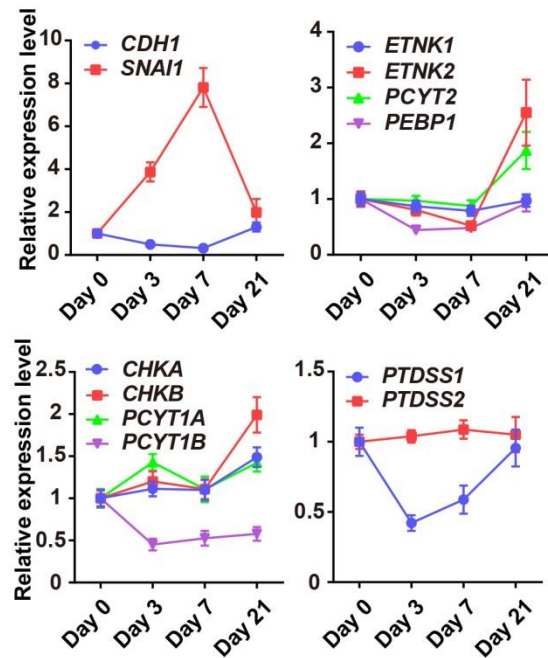

**Fig. S4. The CDP-Etn-Pebp1 axis modulates NF- $\kappa$ B signaling to inhibit mesenchymal genes.**

(A) Western blot analysis of Erk and phosphorylated Erk (p-Erk) on day 2 in MEFs transduced with SKO and shLuc, shEtnk1/2, shPcyt2 or shPebp1 in iCD1 medium (left) and in MEFs transduced with SKO and shLuc or shPebp1 in  $\Delta$ iCD1 or iCD1 medium (right). (B and C) Immunofluorescence staining (green) of NF- $\kappa$ B P65 on day 2 in MEFs transduced with SKO in  $\Delta$ iCD1 or iCD1 medium (B). Scale bar, 25  $\mu$ m. Quantification of relative fluorescence intensity of NF- $\kappa$ B P65 (nucleus/whole cell) on day 2 in MEFs transduced with SKO in  $\Delta$ iCD1 or iCD1 medium (C). Data are shown as mean  $\pm$  SD, and acquired from at least 30 cells from 3 independent experiments. (D and E) qPCR analysis (D) and western blot analysis (E) of Pebp1 expression on day 2 in MEFs transduced with SKO and shLuc, shEtnk1/2 or shPcyt2 in iCD1 medium (left) and in MEFs transduced with SKO in  $\Delta$ iCD1 or iCD1 medium (right). MEFs transfected with empty vector were used as control. (F) Immunofluorescence staining (green) of Pebp1 on day 2 in MEFs transduced with SKO in  $\Delta$ iCD1 or iCD1 medium (up). Scale bar, 100  $\mu$ m. Quantification of relative fluorescence intensity of Pebp1 (nucleus/whole cell) on day 2 in MEFs transduced with SKO in  $\Delta$ iCD1 or iCD1 medium (down). Data are shown as mean  $\pm$  SD, and acquired from at least 30 cells from 3 independent experiments. (D) qRT-PCR analysis of expression of EMT markers (*CDH1* and *SNAI1*), key genes of phospholipids synthesis (*ETNK1*, *ETNK2*, *PCYT2*, *CHKA*, *CHKB*, *PCYT1A*, *PCYT1B*, *PTDSS1*, *PTDSS2*) and *PEBP1* on days 0, 3, 7 and 21 in hepatocyte differentiation. Data are represented as mean  $\pm$  SEM, n=2.

**Table S1. Lipid species identified MEFs, mESCs, and MEFs undergoing SKO**

**reprogramming on days 2, 4, 6, and 8.** Lipids are divided into two categories: lipids with successful matching of MS<sup>2</sup> and lipids with no matching of MS<sup>2</sup>. To the molecules with successful matching of MS<sup>2</sup>, all information of t<sub>R</sub>, MS<sup>1</sup> and MS<sup>2</sup> was employed for more accurate characterization of lipids, including the length of structure chain and position of double bond (e.g., PE (22:1/20:4) ). To the molecules with no matching of MS<sup>2</sup>, the information of t<sub>R</sub> and MS<sup>1</sup> was employed to annotate the class of lipids, such as the length of chain and position of double bond (e.g., PE 48:6).

**Lipid molecules with successful matching of MS<sup>2</sup>**

| Name           | MEF      | Day 2    | Day 4    | Day 6    | Day 8    | mESC     |
|----------------|----------|----------|----------|----------|----------|----------|
| PE(22:1/20:4)  | 3919137  | 8736843  | 10157376 | 3556863  | 2390636  | 1549751  |
| PE(20:1p/22:6) | 14528843 | 28806459 | 42561264 | 22071777 | 19930756 | 9228402  |
| PE(20:1/20:4)  | 17834119 | 55935834 | 46486017 | 15325420 | 12962004 | 8289760  |
| PE(20:1/18:1)  | 58778088 | 59203663 | 87759308 | 69370357 | 83224468 | 50115700 |
| PE(20:0p/22:6) | 27989655 | 50601144 | 60064072 | 29030353 | 25348002 | 19402011 |
| PE(20:0p/22:5) | 8846952  | 16201550 | 22731057 | 12339573 | 11063036 | 9425591  |
| PE(20:0p/20:5) | 1.17E+08 | 2.05E+08 | 2.51E+08 | 1.51E+08 | 1.34E+08 | 54807656 |
| PE(20:0p/20:4) | 92694926 | 2.21E+08 | 3.59E+08 | 2.69E+08 | 3.05E+08 | 69029647 |
| PE(20:0p/18:1) | 43874237 | 91836134 | 1.57E+08 | 1.24E+08 | 1.31E+08 | 3.21E+08 |
| PE(20:0p/16:0) | 1.36E+08 | 1.44E+08 | 2.4E+08  | 2.33E+08 | 2.73E+08 | 4.91E+08 |
| PE(20:0/20:4)  | 17163013 | 45009428 | 74254650 | 25228912 | 40915196 | 4892858  |
| PE(20:0/18:1)  | 15303795 | 37726651 | 65884330 | 52950706 | 74982404 | 1.55E+08 |
| PE(18:2p/22:6) | 24155788 | 33889956 | 37248367 | 21260825 | 17793382 | 528469.3 |
| PE(18:1p/24:6) | 2850091  | 6235141  | 7490725  | 3390032  | 3385144  | 2678962  |
| PE(18:1p/22:6) | 15194790 | 25028931 | 26086336 | 12955501 | 11109474 | 893618.8 |

---

|                       |          |          |          |          |          |          |
|-----------------------|----------|----------|----------|----------|----------|----------|
| <b>PE(18:1p/22:5)</b> | 3417293  | 5362454  | 10220984 | 9220013  | 10759638 | 6837920  |
| <b>PE(18:1p/22:4)</b> | 33790738 | 53203331 | 81244796 | 51385275 | 49443839 | 12983423 |
| <b>PE(18:1p/22:2)</b> | 18097517 | 37081150 | 59840362 | 49559843 | 55415050 | 10689067 |
| <b>PE(18:1p/22:1)</b> | 12477122 | 21133360 | 40085992 | 40164555 | 47665276 | 15988729 |
| <b>PE(18:1p/20:5)</b> | 36730716 | 49494924 | 59605528 | 34530482 | 30442963 | 728553   |
| <b>PE(18:1p/20:4)</b> | 42268634 | 76113355 | 88668621 | 42076474 | 37454616 | 20021854 |
| <b>PE(18:1p/20:1)</b> | 21073659 | 33084461 | 74907618 | 59536747 | 64839145 | 39439072 |
| <b>PE(18:1p/18:2)</b> | 1.83E+08 | 3.71E+08 | 4.81E+08 | 2.82E+08 | 2.58E+08 | 80442764 |
| <b>PE(18:1p/18:1)</b> | 37235407 | 54645815 | 95132136 | 66029437 | 74981301 | 61836387 |
| <b>PE(18:1p/16:0)</b> | 86871788 | 1.1E+08  | 2.13E+08 | 1.84E+08 | 2.28E+08 | 1.51E+08 |
| <b>PE(18:1p/15:0)</b> | 17080699 | 37822021 | 56925912 | 33968328 | 33307959 | 19611560 |
| <b>PE(18:1p/14:0)</b> | 3616143  | 1739310  | 3201102  | 2320482  | 3194613  | 1937437  |
| <b>PE(18:1/24:2)</b>  | 6268398  | 14096925 | 22150633 | 20152830 | 16324214 | 2581106  |
| <b>PE(18:1/24:1)</b>  | 7086618  | 11402398 | 15542604 | 10607822 | 10300313 | 4089966  |
| <b>PE(18:1/24:0)</b>  | 3516775  | 3976354  | 4571926  | 2744775  | 2267573  | 3913041  |
| <b>PE(18:1/22:6)</b>  | 7374209  | 7822538  | 39407891 | 47408943 | 53296827 | 9916206  |
| <b>PE(18:1/22:4)</b>  | 15178482 | 31966595 | 38921399 | 16989392 | 12549380 | 1823355  |
| <b>PE(18:1/22:1)</b>  | 20887633 | 42464020 | 73021194 | 61790927 | 60895696 | 45182174 |
| <b>PE(18:1/19:1)</b>  | 15477681 | 6326372  | 6378073  | 5204297  | 5952293  | 2828320  |
| <b>PE(18:1/18:3)</b>  | 8014412  | 9909136  | 10058454 | 4765649  | 4866091  | 6244527  |
| <b>PE(18:1/18:2)</b>  | 5696619  | 5564245  | 9502282  | 8777127  | 8797155  | 8704111  |
| <b>PE(18:1/18:1)</b>  | 30905207 | 32543602 | 52087908 | 47526653 | 46074799 | 19769651 |
| <b>PE(18:0p/24:6)</b> | 3870712  | 8291546  | 13246113 | 6225032  | 6382890  | 5547880  |
| <b>PE(18:0p/22:6)</b> | 5.17E+08 | 9.5E+08  | 1.4E+09  | 8.38E+08 | 8.84E+08 | 3.03E+08 |
| <b>PE(18:0p/22:4)</b> | 26736709 | 53736251 | 63714750 | 27515648 | 35691566 | 29679098 |

---

|                       |          |          |          |          |          |          |
|-----------------------|----------|----------|----------|----------|----------|----------|
| <b>PE(18:0p/22:3)</b> | 59821126 | 1.32E+08 | 2.65E+08 | 3.02E+08 | 3.2E+08  | 84667990 |
| <b>PE(18:0p/22:1)</b> | 4262642  | 11072634 | 18462505 | 13812435 | 15002058 | 30008553 |
| <b>PE(18:0p/20:5)</b> | 2.12E+09 | 4.52E+09 | 7.16E+09 | 4.23E+09 | 4.68E+09 | 9.9E+08  |
| <b>PE(18:0p/20:4)</b> | 2.92E+08 | 9.76E+08 | 1.29E+09 | 5.22E+08 | 9.32E+08 | 6.7E+08  |
| <b>PE(18:0p/20:3)</b> | 51272832 | 99888747 | 1.65E+08 | 1.6E+08  | 1.63E+08 | 2.36E+08 |
| <b>PE(18:0p/18:1)</b> | 5.59E+08 | 6.89E+08 | 1.35E+09 | 1.26E+09 | 1.66E+09 | 3.18E+09 |
| <b>PE(18:0p/16:0)</b> | 7943528  | 9579749  | 16153291 | 18512006 | 16995481 | 23405715 |
| <b>PE(18:0/22:4)</b>  | 18249595 | 39532505 | 76547078 | 27748013 | 27179561 | 4907377  |
| <b>PE(18:0/22:3)</b>  | 27511866 | 75091967 | 1.3E+08  | 1.04E+08 | 1.04E+08 | 19400482 |
| <b>PE(18:0/21:3)</b>  | 2104591  | 4267503  | 4944360  | 2959658  | 2768000  | 6556682  |
| <b>PE(18:0/20:5)</b>  | 88501568 | 1.75E+08 | 2.14E+08 | 1.14E+08 | 90235784 | 13344412 |
| <b>PE(18:0/20:4)</b>  | 1.11E+08 | 1.39E+08 | 1.91E+08 | 2.02E+08 | 2.32E+08 | 74584202 |
| <b>PE(18:0/20:3)</b>  | 12755945 | 19270335 | 29539771 | 23946246 | 26312856 | 6465905  |
| <b>PE(18:0/20:2)</b>  | 1.01E+08 | 2.1E+08  | 4.06E+08 | 2.61E+08 | 3.11E+08 | 5.42E+08 |
| <b>PE(18:0/18:1)</b>  | 8114130  | 12598637 | 31030857 | 26143113 | 25594506 | 17761077 |
| <b>PE(18:0/16:1)</b>  | 1.13E+09 | 1.92E+09 | 3.17E+09 | 2.24E+09 | 2.61E+09 | 3.35E+09 |
| <b>PE(17:1/20:4)</b>  | 10728601 | 14342118 | 13836576 | 7469663  | 4832595  | 10914107 |
| <b>PE(17:0/20:4)</b>  | 24485887 | 39343099 | 42336782 | 28456704 | 23936286 | 2460001  |
| <b>PE(17:0/19:0)</b>  | 50259167 | 1.25E+08 | 1.96E+08 | 1.25E+08 | 1.35E+08 | 3.57E+08 |
| <b>PE(17:0/17:0)</b>  | 8681979  | 9653140  | 13191987 | 8347471  | 9928233  | 7311010  |
| <b>PE(16:1/18:1)</b>  | 7.35E+08 | 9.26E+08 | 1.84E+09 | 1.69E+09 | 2.09E+09 | 3.78E+08 |
| <b>PE(16:1/16:1)</b>  | 45894678 | 39427344 | 74307835 | 86259120 | 1.18E+08 | 14047568 |
| <b>PE(16:1/14:0)</b>  | 5776206  | 5144693  | 12217595 | 8852499  | 9359428  | 3597973  |
| <b>PE(16:0p/22:4)</b> | 3.51E+08 | 6.88E+08 | 9.94E+08 | 5.72E+08 | 6.77E+08 | 1.48E+08 |
| <b>PE(16:0p/22:3)</b> | 75357078 | 1.74E+08 | 1.78E+08 | 68494297 | 1.35E+08 | 1.05E+08 |

---

|                       |          |          |          |          |          |          |
|-----------------------|----------|----------|----------|----------|----------|----------|
| <b>PE(16:0p/22:1)</b> | 63959226 | 78751132 | 1.68E+08 | 1.4E+08  | 2.12E+08 | 66064297 |
| <b>PE(16:0p/21:3)</b> | 12234659 | 53013177 | 58245868 | 36235931 | 35928098 | 1333073  |
| <b>PE(16:0p/20:4)</b> | 45366774 | 77005590 | 96219532 | 47133840 | 47119328 | 20588558 |
| <b>PE(16:0p/20:3)</b> | 3E+08    | 4.73E+08 | 7.85E+08 | 5.59E+08 | 6.3E+08  | 5.22E+08 |
| <b>PE(16:0p/18:2)</b> | 7.63E+08 | 7.63E+08 | 1.83E+09 | 1.76E+09 | 2.01E+09 | 1.33E+09 |
| <b>PE(16:0p/18:1)</b> | 9790503  | 11751639 | 12534568 | 11990741 | 12386820 | 25116331 |
| <b>PE(16:0p/16:0)</b> | 4410047  | 3642109  | 6612572  | 7176423  | 7964239  | 5554591  |
| <b>PE(16:0/22:6)</b>  | 2.48E+08 | 2.4E+08  | 2.29E+08 | 1.15E+08 | 79639508 | 16498754 |
| <b>PE(16:0/22:5)</b>  | 51601984 | 1.74E+08 | 3.83E+08 | 3.48E+08 | 4.8E+08  | 3.17E+08 |
| <b>PE(16:0/22:1)</b>  | 21111934 | 28443903 | 37238579 | 24569949 | 28002767 | 28814254 |
| <b>PE(16:0/20:5)</b>  | 66276266 | 95648580 | 97923859 | 36735732 | 48149153 | 4741000  |
| <b>PE(16:0/20:4)</b>  | 55019055 | 52661463 | 73123088 | 56982497 | 63979493 | 7445580  |
| <b>PE(16:0/20:3)</b>  | 99018257 | 97156123 | 2.44E+08 | 2.94E+08 | 3.19E+08 | 39011071 |
| <b>PE(16:0/20:1)</b>  | 60961593 | 72107774 | 1.05E+08 | 53257578 | 84969355 | 47449889 |
| <b>PE(16:0/18:1)</b>  | 35477383 | 44602944 | 66978637 | 47033229 | 56403562 | 28538592 |
| <b>PE(16:0/16:1)</b>  | 3.98E+08 | 4.37E+08 | 7.36E+08 | 6.33E+08 | 8.82E+08 | 1.72E+08 |
| <b>PE(16:0/16:0)</b>  | 38316223 | 42124833 | 72046822 | 63879594 | 85529875 | 15606010 |
| <b>PE(16:0/14:0)</b>  | 18472327 | 31964397 | 66469092 | 50799051 | 61700768 | 63760050 |
| <b>PC(19:0/19:0)</b>  | 19438105 | 12597157 | 11694990 | 20215749 | 13091335 | 19956215 |
| <b>PC(26:2/16:0)</b>  | 3253866  | 2297150  | 2147692  | 2599821  | 4300262  | 2879604  |
| <b>PC(26:1/18:1)</b>  | 11147323 | 3888439  | 2133831  | 2028107  | 2552979  | 29762931 |
| <b>PC(26:1/16:1)</b>  | 51363593 | 25930561 | 21492650 | 24903806 | 40192834 | 1.22E+08 |
| <b>PC(24:5/18:1)</b>  | 897958.5 | 1689857  | 1285448  | 2184584  | 5936022  | 7834870  |
| <b>PC(20:1/18:1)</b>  | 6574952  | 5686745  | 4807147  | 6622628  | 10503639 | 37741924 |
| <b>PC(20:0e/16:0)</b> | 1199996  | 859085.3 | 557631.5 | 300921.8 | 603961.8 | 29517835 |

---

|                         |          |          |          |          |          |          |
|-------------------------|----------|----------|----------|----------|----------|----------|
| <b>PC(19:0/19:0)</b>    | 10806100 | 9465531  | 9132346  | 9754931  | 20731168 | 86593461 |
| <b>PC(18:2/20:4)</b>    | 8141172  | 9044582  | 6594314  | 4908467  | 6901260  | 53473392 |
| <b>PC(18:1p/20:4)</b>   | 1724482  | 1356882  | 735148.6 | 496029.8 | 585816.2 | 5076214  |
| <b>PC(18:1p/20:3)</b>   | 6834503  | 12276217 | 9497213  | 8032846  | 12878504 | 9357384  |
| <b>PC(18:1p/16:1)</b>   | 3712605  | 3191529  | 3042247  | 3455122  | 8376093  | 6054604  |
| <b>PC(18:1p/16:0)</b>   | 68983165 | 58807188 | 67090306 | 90635942 | 1.82E+08 | 4.98E+08 |
| <b>PC(18:1/24:0)</b>    | 4689382  | 2168923  | 1450098  | 1554740  | 2480920  | 4641038  |
| <b>PC(18:1/22:1)</b>    | 6133919  | 5373651  | 5717797  | 7711639  | 14331632 | 3640410  |
| <b>PC(18:1/20:4)</b>    | 19174615 | 21731802 | 13819760 | 9352125  | 15327064 | 11058450 |
| <b>PC(18:1/14:0)</b>    | 1.88E+09 | 1.53E+09 | 1.51E+09 | 1.96E+09 | 3.88E+09 | 5.22E+09 |
| <b>PC(18:0p/22:6)</b>   | 2744161  | 3603077  | 2555972  | 2243257  | 3622007  | 3222357  |
| <b>PC(18:0p/22:5)</b>   | 1504066  | 2554833  | 1658957  | 1282887  | 1761353  | 3595963  |
| <b>PC(18:0p/22:4)</b>   | 2778083  | 4665439  | 3562376  | 2952911  | 4916853  | 1898936  |
| <b>PC(18:0p/18:2)</b>   | 4314205  | 4538374  | 4658229  | 5091945  | 8712402  | 35413229 |
| <b>PC(18:0p/18:1)</b>   | 1.26E+08 | 1.27E+08 | 1.32E+08 | 1.81E+08 | 3.25E+08 | 1.24E+09 |
| <b>PC(18:0p/16:0)-2</b> | 8519136  | 5499800  | 4176725  | 6172930  | 9107249  | 53288522 |
| <b>PC(18:0p/16:0)</b>   | 2968429  | 2040831  | 2903777  | 3779525  | 6821068  | 6504161  |
| <b>PC(18:0e/20:4)</b>   | 3381820  | 3956099  | 4134239  | 4336411  | 7330248  | 8078507  |
| <b>PC(18:0e/18:1)</b>   | 48768234 | 41276773 | 35985505 | 43218000 | 77481776 | 1.1E+09  |
| <b>PC(18:0/20:3)</b>    | 5864130  | 5853932  | 5363119  | 5670829  | 12352331 | 7607917  |
| <b>PC(18:0/18:0)</b>    | 6288949  | 3205987  | 2569545  | 3224947  | 5527820  | 59568939 |
| <b>PC(18:0/17:0)</b>    | 2972673  | 3046749  | 2344197  | 3140765  | 1912796  | 8192589  |
| <b>PC(18:0/16:0)</b>    | 1.21E+08 | 70495266 | 55160307 | 67106891 | 1.17E+08 | 3.82E+08 |
| <b>PC(17:1/18:3)</b>    | 5195888  | 5015818  | 6153761  | 7725150  | 27218499 | 5059974  |
| <b>PC(17:0/18:1)</b>    | 13188087 | 14106420 | 10954966 | 13211642 | 23606228 | 12241453 |

---

|                           |          |          |          |          |          |          |
|---------------------------|----------|----------|----------|----------|----------|----------|
| <b>PC(16:1/18:1)</b>      | 2.01E+09 | 1.92E+09 | 1.88E+09 | 2.49E+09 | 5.15E+09 | 4.09E+09 |
| <b>PC(16:1/16:1)</b>      | 7.75E+08 | 5.93E+08 | 4.62E+08 | 7.28E+08 | 1.25E+09 | 2.45E+08 |
| <b>PC(16:1/12:0)</b>      | 7660870  | 2828219  | 4092578  | 7786403  | 7463590  | 8962357  |
| <b>PC(16:0e/20:4)</b>     | 11298388 | 14062549 | 10338652 | 7630153  | 17647816 | 16726566 |
| <b>PC(16:0e/20:1)</b>     | 16168139 | 16649193 | 17691758 | 24465895 | 43124410 | 1.69E+08 |
| <b>PC(16:0e/18:1)</b>     | 4.25E+08 | 3.24E+08 | 3.1E+08  | 3.98E+08 | 8.05E+08 | 3.79E+09 |
| <b>PC(16:0e/16:1)</b>     | 1.33E+08 | 88854507 | 88883443 | 1.13E+08 | 2.27E+08 | 1.68E+09 |
| <b>PC(16:0e/16:0)</b>     | 15355149 | 10087579 | 9750080  | 12990559 | 26100429 | 2.04E+08 |
| <b>PC(16:0e/14:0)</b>     | 19423190 | 10435220 | 6362422  | 7882278  | 14057282 | 5.66E+08 |
| <b>PC(16:0/24:1)</b>      | 29812745 | 19879349 | 14085333 | 16765260 | 23089752 | 1.03E+08 |
| <b>PC(16:0/24:0)</b>      | 3141972  | 1320582  | 763613.2 | 732657.8 | 1153267  | 14284556 |
| <b>PC(16:0/22:4)</b>      | 42430106 | 38739241 | 43406404 | 48530288 | 92616707 | 59522784 |
| <b>PC(16:0/22:1)</b>      | 66794603 | 62360246 | 58130958 | 65886055 | 1.44E+08 | 5.6E+08  |
| <b>PC(16:0/21:1)</b>      | 12217167 | 12379638 | 9166616  | 8604409  | 14047553 | 18212500 |
| <b>PC(16:0/20:4)</b>      | 10407287 | 9215015  | 6312671  | 7841796  | 21982810 | 13718829 |
| <b>PC(16:0/20:1)</b>      | 18909526 | 20364774 | 30148073 | 24945711 | 48416994 | 63461648 |
| <b>PC(16:0/18:1)</b>      | 1.25E+08 | 1.36E+08 | 1.25E+08 | 1.42E+08 | 2.43E+08 | 1.27E+08 |
| <b>PC(16:0/17:1)</b>      | 8584299  | 9547260  | 11276540 | 10988865 | 26272963 | 29218795 |
| <b>PC(16:0/17:0)</b>      | 16064375 | 17656130 | 15571081 | 18471311 | 32055966 | 13485803 |
| <b>PC(16:0/16:1)</b>      | 69122755 | 61119171 | 60785055 | 69972978 | 1.29E+08 | 47674227 |
| <b>PC(16:0/16:0)</b>      | 23837857 | 21076839 | 18282889 | 21001501 | 34751541 | 67322082 |
| <b>PC(16:0/14:0)</b>      | 18742578 | 15799582 | 12565565 | 15196578 | 24756488 | 29208091 |
| <b>PC(14:0/18:3)</b>      | 7542069  | 5564499  | 6035955  | 6651722  | 16664792 | 1916359  |
| <b>PC(12:0/18:2)</b>      | 51695324 | 32707262 | 36019737 | 48559371 | 98683187 | 2900663  |
| <b>TG(15:0/15:0/15:0)</b> | 12627677 | 18969949 | 14797720 | 17178152 | 17173782 | 79457311 |

---



|                      |          |          |          |          |          |          |
|----------------------|----------|----------|----------|----------|----------|----------|
| <b>PS(20:3/22:6)</b> | 7810553  | 4987188  | 6366211  | 9137733  | 11052272 | 67871.82 |
| <b>PS(20:3/20:4)</b> | 1319801  | 2106517  | 2227553  | 1603449  | 1364365  | 1969960  |
| <b>PS(20:1/18:1)</b> | 1438391  | 802963.7 | 1590354  | 1440729  | 296123.7 | 5156059  |
| <b>PS(19:1/22:5)</b> | 2969365  | 2986587  | 2091091  | 920643.4 | 465735.6 | 121459.9 |
| <b>PS(18:1/24:1)</b> | 20380397 | 21072113 | 21540839 | 24103213 | 24634982 | 707581.5 |
| <b>PS(18:1/22:5)</b> | 6682605  | 6772121  | 8841743  | 2988531  | 1803951  | 10698093 |
| <b>PS(18:1/22:2)</b> | 88301973 | 1.17E+08 | 78166262 | 63498561 | 50198985 | 4184798  |
| <b>PS(18:1/22:1)</b> | 2.97E+08 | 2.97E+08 | 2.22E+08 | 2.11E+08 | 2.42E+08 | 47214590 |
| <b>PS(18:1/19:1)</b> | 77419084 | 1.44E+08 | 2.04E+08 | 3.08E+08 | 3.25E+08 | 8016935  |
| <b>PS(18:1/18:1)</b> | 4202587  | 3794347  | 3120679  | 1291103  | 978670.2 | 8633308  |
| <b>PS(18:0/22:5)</b> | 4476424  | 4934100  | 5784692  | 2594395  | 1562031  | 17823432 |
| <b>PS(18:0/20:4)</b> | 7743049  | 3048386  | 2427717  | 2577413  | 602163.4 | 1509666  |
| <b>PS(18:0/20:1)</b> | 7077040  | 6563098  | 6959273  | 7188183  | 9658870  | 246507   |
| <b>PS(18:0/19:1)</b> | 1.03E+08 | 1.55E+08 | 1.7E+08  | 1.52E+08 | 2.88E+08 | 58662390 |
| <b>PS(18:0/18:1)</b> | 25830717 | 19121207 | 24365225 | 28388863 | 46599499 | 2800485  |
| <b>PS(18:0/16:1)</b> | 13391697 | 11974322 | 6943554  | 4745315  | 3788350  | 7283276  |
| <b>PS(17:1/18:1)</b> | 7939960  | 9192164  | 9680138  | 8652459  | 8944725  | 2564433  |
| <b>PS(17:0/20:4)</b> | 3681682  | 5224659  | 5610956  | 5469917  | 5039970  | 673680.8 |
| <b>PS(17:0/18:1)</b> | 6324557  | 6361685  | 12310326 | 29861208 | 21908634 | 64508501 |
| <b>PS(16:1/18:1)</b> | 5243427  | 2061939  | 3384277  | 4428354  | 2052460  | 4239936  |
| <b>PS(16:0/20:2)</b> | 24288871 | 20546428 | 12113915 | 24009568 | 23007500 | 168457.1 |
| <b>PS(16:0/17:1)</b> | 36268166 | 21799443 | 27747362 | 28919018 | 27932143 | 10013433 |
| <b>PI(19:0/20:4)</b> | 3872509  | 4270281  | 3382973  | 5739657  | 4790474  | 3445968  |
| <b>PI(18:1/22:2)</b> | 1456298  | 1042056  | 862029.6 | 850214.9 | 734592.4 | 2197913  |
| <b>PI(18:1/18:2)</b> | 4707917  | 4070233  | 3122088  | 3321015  | 2562634  | 461904.1 |

---

|                      |          |          |          |          |          |          |
|----------------------|----------|----------|----------|----------|----------|----------|
| <b>PI(18:0/20:4)</b> | 3828041  | 2052676  | 1510208  | 330999   | 544105.1 | 3124339  |
| <b>PI(18:0/20:3)</b> | 13371668 | 13559340 | 9361254  | 3365750  | 2655301  | 5932684  |
| <b>PI(18:0/18:2)</b> | 65782464 | 37763192 | 51729958 | 19999128 | 15085380 | 2.72E+08 |
| <b>PI(18:0/18:1)</b> | 9714901  | 5964069  | 7694821  | 2810483  | 2124074  | 39954187 |
| <b>PI(17:1/18:1)</b> | 1408218  | 719626.2 | 1353994  | 1103480  | 545982.6 | 312486.3 |
| <b>PI(17:0/18:1)</b> | 1860851  | 1349728  | 1394288  | 847357.8 | 515524.5 | 79764.15 |
| <b>PI(16:1/18:1)</b> | 19425765 | 11431550 | 11658898 | 7532332  | 5899753  | 17526009 |
| <b>PI(16:1/17:0)</b> | 13747233 | 12304312 | 10026708 | 7508384  | 6858570  | 1025428  |
| <b>PI(16:0/18:1)</b> | 13423741 | 9795613  | 9849705  | 5570997  | 3193812  | 29721365 |
| <b>PI(16:0/16:1)</b> | 5119663  | 4131053  | 4963437  | 2238288  | 1919297  | 2710092  |
| <b>PG(20:2/22:6)</b> | 50315235 | 56595698 | 36148793 | 29048481 | 19922380 | 4834857  |
| <b>PG(20:2/22:5)</b> | 5322584  | 4331978  | 3122283  | 1008201  | 1310431  | 378228.8 |
| <b>PG(18:2/18:2)</b> | 4021682  | 2656224  | 4457394  | 3871994  | 5382463  | 656410.1 |
| <b>PG(18:1/22:4)</b> | 50724309 | 35571376 | 22753643 | 18719997 | 15517762 | 337842.4 |
| <b>PG(18:1/20:4)</b> | 3.17E+08 | 2.08E+08 | 1.49E+08 | 1.56E+08 | 1.34E+08 | 1312868  |
| <b>PG(18:1/20:3)</b> | 89688943 | 69688695 | 76850781 | 1.16E+08 | 1.16E+08 | 5023671  |
| <b>PG(18:1/20:2)</b> | 29700860 | 19521322 | 25691828 | 18648761 | 30764079 | 1261950  |
| <b>PG(18:1/18:3)</b> | 21451220 | 8380041  | 12084970 | 22951156 | 12770387 | 624537.7 |
| <b>PG(18:1/18:2)</b> | 2.3E+09  | 1.11E+09 | 1.21E+09 | 1.67E+09 | 1.98E+09 | 9887178  |
| <b>PG(18:1/18:1)</b> | 1.44E+09 | 1.58E+09 | 2.27E+09 | 2.35E+09 | 2.75E+09 | 5E+08    |
| <b>PG(18:1/14:0)</b> | 95075975 | 27012394 | 26015820 | 19395890 | 23694259 | 10670771 |
| <b>PG(18:0/18:1)</b> | 3.51E+08 | 2.35E+08 | 2.6E+08  | 2.62E+08 | 2.68E+08 | 2.3E+08  |
| <b>PG(18:0/16:0)</b> | 2128979  | 1494810  | 1544453  | 1551970  | 1159146  | 3451328  |
| <b>PG(17:1/18:1)</b> | 64350995 | 36126779 | 40467465 | 29278836 | 56049391 | 482085.2 |
| <b>PG(16:1/22:6)</b> | 8750071  | 6753150  | 4216879  | 4331048  | 3503844  | 145401.9 |

---

|                      |          |          |          |          |          |          |
|----------------------|----------|----------|----------|----------|----------|----------|
| <b>PG(16:1/18:2)</b> | 13321792 | 12569316 | 11878207 | 14327809 | 28040020 | 248255.2 |
| <b>PG(16:1/18:1)</b> | 54969256 | 38293271 | 47639343 | 46163918 | 49413513 | 16768369 |
| <b>PG(16:0/18:1)</b> | 94240561 | 61852514 | 87475898 | 1.26E+08 | 1.62E+08 | 2589452  |
| <b>PG(16:0/16:0)</b> | 2792714  | 2331873  | 2538416  | 2078257  | 1677610  | 7026914  |

### Lipid molecules with no matching of MS<sup>2</sup>

| <b>Name</b>        | <b>MEF</b> | <b>Day 2</b> | <b>Day 4</b> | <b>Day 6</b> | <b>Day 8</b> | <b>mESC</b> |
|--------------------|------------|--------------|--------------|--------------|--------------|-------------|
| <b>PE O-45:1</b>   | 5158339    | 12327585     | 21624031     | 22903130     | 15055618     | 6693326     |
| <b>PE O-42:7-2</b> | 1525056    | 3518864      | 4815956      | 2445144      | 2042380      | 13623941    |
| <b>PE O-42:7-1</b> | 1943471    | 3036053      | 6221959      | 4631096      | 3605214      | 24277963    |
| <b>PE O-42:3</b>   | 3.19E+08   | 4.79E+08     | 6.22E+08     | 5.28E+08     | 2.65E+08     | 18385977    |
| <b>PE O-42:2</b>   | 2.59E+09   | 4.56E+09     | 5.98E+09     | 4.65E+09     | 3.25E+09     | 3.57E+09    |
| <b>PE O-42:1-3</b> | 92103881   | 1.92E+08     | 1.92E+08     | 1.2E+08      | 57894642     | 2.96E+08    |
| <b>PE O-41:3</b>   | 12123435   | 20197201     | 27485182     | 27202768     | 24798239     | 80871096    |
| <b>PE O-40:9</b>   | 2367957    | 4665009      | 9102095      | 4295200      | 2216412      | 17236096    |
| <b>PE O-40:8-1</b> | 3849264    | 4955111      | 8011401      | 11438101     | 6964743      | 27184857    |
| <b>PE O-40:7-2</b> | 43895261   | 69202703     | 70352851     | 53798801     | 32509350     | 1.92E+08    |
| <b>PE O-40:6-7</b> | 11464673   | 20082915     | 25689610     | 13230008     | 9361424      | 13830601    |
| <b>PE O-40:6-6</b> | 3888296    | 6259681      | 8640037      | 4574604      | 2983321      | 35728284    |
| <b>PE O-40:4</b>   | 4187961    | 16913626     | 21067647     | 15470926     | 9092872      | 10399621    |
| <b>PE O-40:3</b>   | 34508356   | 34158948     | 22725837     | 10066741     | 7503666      | 1.61E+08    |
| <b>PE O-40:2-1</b> | 9747800    | 12757799     | 16562141     | 18445596     | 12831175     | 13197529    |
| <b>PE O-40:2</b>   | 1423974    | 4692452      | 3893263      | 3428154      | 2234238      | 11119420    |
| <b>PE O-40:1</b>   | 2770898    | 6525579      | 6898615      | 6157703      | 8215555      | 10982120    |
| <b>PE O-39:3-1</b> | 28792033   | 48499048     | 47662305     | 27098055     | 20883472     | 1.28E+08    |

|                    |          |          |          |          |          |          |
|--------------------|----------|----------|----------|----------|----------|----------|
| <b>PE O-39:2-1</b> | 36411790 | 33616457 | 77950947 | 45195808 | 43002005 | 3.31E+08 |
| <b>PE O-38:7-1</b> | 746879.3 | 1790444  | 2837354  | 1929721  | 1545265  | 12240558 |
| <b>PE O-38:6-2</b> | 9173616  | 24270061 | 27218089 | 13480989 | 7651420  | 36389548 |
| <b>PE O-38:6</b>   | 2200882  | 7733127  | 10695960 | 7551283  | 3400019  | 25831636 |
| <b>PE O-38:5-2</b> | 821448.4 | 2857125  | 5548772  | 2863018  | 2630844  | 3781309  |
| <b>PE O-38:4-1</b> | 18808460 | 25941726 | 43533584 | 27824305 | 15758386 | 25568128 |
| <b>PE O-38:4</b>   | 2075490  | 10704289 | 20054355 | 12778919 | 10674409 | 16846795 |
| <b>PE O-38:3-2</b> | 16292508 | 36859940 | 51778160 | 50459135 | 28339540 | 61779587 |
| <b>PE O-37:4</b>   | 35379210 | 43575850 | 64732527 | 40622214 | 34366288 | 3.02E+08 |
| <b>PE O-37:3-1</b> | 10072894 | 9774739  | 10033116 | 6494759  | 5237227  | 2.32E+08 |
| <b>PE O-37:2</b>   | 46508029 | 52378927 | 1.29E+08 | 1.32E+08 | 1.2E+08  | 5.17E+08 |
| <b>PE O-37:1-1</b> | 3340043  | 5492705  | 8754440  | 7786810  | 6965063  | 11688563 |
| <b>PE O-37:1</b>   | 46178725 | 56280807 | 1.35E+08 | 89058591 | 82879694 | 2.99E+08 |
| <b>PE O-37:0</b>   | 68902401 | 55153822 | 48270929 | 40473415 | 19676401 | 1.78E+09 |
| <b>PE O-36:5-1</b> | 8104618  | 15267070 | 22455989 | 11976582 | 12187887 | 25638947 |
| <b>PE O-36:4-1</b> | 17987986 | 1.01E+08 | 1.26E+08 | 45598518 | 35444560 | 55008684 |
| <b>PE O-36:4</b>   | 45388678 | 1.04E+08 | 1.45E+08 | 1.19E+08 | 85430581 | 2.51E+08 |
| <b>PE O-36:3-2</b> | 12434439 | 38047048 | 45867948 | 41855347 | 50278592 | 1.23E+08 |
| <b>PE O-36:3-1</b> | 8813790  | 14709021 | 21469500 | 27581082 | 22122818 | 56344925 |
| <b>PE O-36:3</b>   | 3035780  | 6873231  | 11191089 | 10271550 | 6344537  | 19124686 |
| <b>PE O-36:2-2</b> | 1.69E+08 | 1.89E+08 | 3.46E+08 | 3.11E+08 | 1.98E+08 | 7.31E+08 |
| <b>PE O-36:1-1</b> | 9681386  | 8156752  | 13937266 | 7994519  | 10612821 | 45839856 |
| <b>PE O-36:1</b>   | 8570096  | 28344927 | 29101509 | 21306176 | 7854340  | 40209414 |
| <b>PE O-36:0</b>   | 10263949 | 9749479  | 8293636  | 5568931  | 2178469  | 39585465 |
| <b>PE O-35:4-1</b> | 1845633  | 2182894  | 3361727  | 3043995  | 2137080  | 9249886  |

---

|                    |          |          |          |          |          |          |
|--------------------|----------|----------|----------|----------|----------|----------|
| <b>PE O-35:3-1</b> | 4623550  | 5622272  | 5403932  | 4240077  | 2262286  | 1.14E+08 |
| <b>PE O-35:2-2</b> | 11010419 | 22006214 | 31216593 | 17618113 | 11410607 | 49689249 |
| <b>PE O-35:2</b>   | 1.59E+08 | 1.03E+08 | 1.42E+08 | 89567083 | 1.11E+08 | 46054482 |
| <b>PE O-35:1-1</b> | 1.88E+08 | 1.69E+08 | 1.86E+08 | 1.45E+08 | 1.05E+08 | 3.75E+08 |
| <b>PE O-35:1</b>   | 1.39E+08 | 1.62E+08 | 2.73E+08 | 1.93E+08 | 1.48E+08 | 1.25E+09 |
| <b>PE O-35:0</b>   | 5.98E+08 | 4.11E+08 | 3.49E+08 | 2.85E+08 | 1.5E+08  | 5.82E+09 |
| <b>PE O-34:2-1</b> | 5093659  | 12868284 | 24139976 | 23142971 | 16517026 | 1.19E+08 |
| <b>PE O-34:2</b>   | 2520105  | 5139904  | 7069896  | 6764692  | 3601643  | 23896889 |
| <b>PE O-34:1-1</b> | 1.17E+08 | 1.33E+08 | 2.11E+08 | 1.47E+08 | 96759634 | 7.55E+08 |
| <b>PE O-34:1</b>   | 11087145 | 6833756  | 5616821  | 2489684  | 1621207  | 3364729  |
| <b>PE O-34:0</b>   | 9247217  | 17015608 | 13580548 | 7927150  | 4106050  | 65860152 |
| <b>PE O-33:2-4</b> | 9735362  | 23023128 | 27448535 | 14260160 | 9279448  | 21031451 |
| <b>PE O-33:1</b>   | 33492760 | 28348100 | 32095423 | 17997616 | 18162863 | 1.06E+08 |
| <b>PE O-33:0</b>   | 1.99E+08 | 1.61E+08 | 1.42E+08 | 1.02E+08 | 55434908 | 2.34E+09 |
| <b>PE O-32:4</b>   | 3951971  | 6089875  | 10809286 | 5693106  | 3213753  | 37861816 |
| <b>PE O-32:0</b>   | 16162481 | 15194565 | 8704625  | 4593198  | 1622503  | 75664385 |
| <b>PE O-31:0</b>   | 28085954 | 18783409 | 14381215 | 8647533  | 3257548  | 1.7E+08  |
| <b>PE O-27:0</b>   | 43555091 | 32924251 | 30982783 | 24310820 | 12290387 | 27047759 |
| <b>PE 48:6</b>     | 1393364  | 4142959  | 5239641  | 4020203  | 2713398  | 23897068 |
| <b>PE 44:9</b>     | 1349977  | 2404159  | 3818624  | 3920989  | 1675544  | 3288138  |
| <b>PE 44:1</b>     | 1605127  | 1414123  | 1994147  | 1852821  | 981094   | 3486692  |
| <b>PE 43:6</b>     | 1.67E+08 | 3.35E+08 | 3.37E+08 | 1.12E+08 | 52796252 | 31178738 |
| <b>PE 43:5</b>     | 31462092 | 1.72E+08 | 1.43E+08 | 49750165 | 21689600 | 14341876 |
| <b>PE 43:4-1</b>   | 1.5E+08  | 3.08E+08 | 4.21E+08 | 2.43E+08 | 1.45E+08 | 35376007 |
| <b>PE 42:9</b>     | 24718460 | 38535664 | 60264511 | 33549009 | 19261069 | 8517503  |

---

|                  |          |          |          |          |          |          |
|------------------|----------|----------|----------|----------|----------|----------|
| <b>PE 42:8</b>   | 5651376  | 12925997 | 25012540 | 25572418 | 18539719 | 34074081 |
| <b>PE 42:7</b>   | 1375463  | 2732350  | 12675688 | 25142512 | 13189636 | 12853652 |
| <b>PE 42:5</b>   | 3374491  | 15831501 | 7286619  | 2839106  | 551330   | 7893112  |
| <b>PE 42:4</b>   | 12018874 | 34898366 | 48516571 | 22771168 | 15397771 | 1.18E+08 |
| <b>PE 42:3</b>   | 11475206 | 25335474 | 35255625 | 21896687 | 8884556  | 49554832 |
| <b>PE 41:7</b>   | 35879841 | 68217665 | 73233665 | 30582780 | 8789182  | 15378187 |
| <b>PE 41:6</b>   | 44254132 | 85037611 | 1.31E+08 | 73748134 | 64309257 | 56304083 |
| <b>PE 41:5</b>   | 48621883 | 1.57E+08 | 1.7E+08  | 2.26E+08 | 2.21E+08 | 1.38E+09 |
| <b>PE 41:4</b>   | 4.36E+08 | 1.17E+09 | 1.33E+09 | 4.26E+08 | 3.03E+08 | 2.58E+08 |
| <b>PE 41:3</b>   | 1.97E+08 | 3.67E+08 | 5.17E+08 | 4.56E+08 | 3.05E+08 | 1.47E+08 |
| <b>PE 41:2</b>   | 2.31E+08 | 1.55E+08 | 2.32E+08 | 1.39E+08 | 1.01E+08 | 1.11E+09 |
| <b>PE 41:1</b>   | 2.4E+08  | 2.45E+08 | 2.89E+08 | 2.95E+08 | 2.51E+08 | 6.25E+09 |
| <b>PE 40:7</b>   | 1222887  | 1131833  | 3215426  | 2828896  | 409622.9 | 14691892 |
| <b>PE 40:6-2</b> | 82766565 | 2.39E+08 | 2.47E+08 | 1.13E+08 | 49455052 | 59125188 |
| <b>PE 40:5</b>   | 16656542 | 43859189 | 51764058 | 28509829 | 22023010 | 35285331 |
| <b>PE 40:4-2</b> | 22019305 | 57316219 | 63185784 | 41560295 | 19143879 | 39648902 |
| <b>PE 40:4-1</b> | 17150263 | 35535592 | 74607310 | 26827517 | 16384563 | 23745346 |
| <b>PE 40:3</b>   | 6853449  | 36943189 | 52667644 | 26426496 | 14204018 | 35010897 |
| <b>PE 40:2</b>   | 1.62E+08 | 2.97E+08 | 3.19E+08 | 2.08E+08 | 99501412 | 1.61E+08 |
| <b>PE 40:1</b>   | 32117080 | 63563220 | 80976917 | 42819208 | 19534147 | 39692769 |
| <b>PE 39:6</b>   | 16057313 | 20522652 | 27347596 | 22243284 | 17407787 | 13276687 |
| <b>PE 39:5-1</b> | 1.13E+08 | 4.35E+08 | 6.1E+08  | 3.38E+08 | 1.81E+08 | 6.21E+08 |
| <b>PE 39:4-1</b> | 76326432 | 1.54E+08 | 1.52E+08 | 1.42E+08 | 1.45E+08 | 2.35E+09 |
| <b>PE 39:3</b>   | 3.04E+08 | 5.6E+08  | 9.22E+08 | 6.34E+08 | 4.55E+08 | 88458764 |
| <b>PE 39:2</b>   | 4846483  | 6716933  | 13877411 | 12233010 | 8050391  | 51229679 |

---

|                  |          |          |          |          |          |          |
|------------------|----------|----------|----------|----------|----------|----------|
| <b>PE 39:1</b>   | 3.43E+08 | 4.42E+08 | 5.59E+08 | 4.47E+08 | 3.38E+08 | 6.27E+08 |
| <b>PE 39:0</b>   | 72783115 | 43011810 | 48963759 | 46637498 | 25895419 | 3.77E+08 |
| <b>PE 38:5-1</b> | 35361466 | 95342838 | 1.24E+08 | 59477933 | 46174624 | 3.48E+08 |
| <b>PE 38:4-3</b> | 78045220 | 1.57E+08 | 1.57E+08 | 86295667 | 48025434 | 24946188 |
| <b>PE 38:3-1</b> | 9052148  | 18961578 | 27853913 | 24469736 | 12810906 | 5361387  |
| <b>PE 38:2</b>   | 17411373 | 14650093 | 19710904 | 16733422 | 12491496 | 23823567 |
| <b>PE 38:1</b>   | 3.83E+08 | 7.35E+08 | 7.08E+08 | 4.53E+08 | 2.08E+08 | 3.17E+08 |
| <b>PE 38:0</b>   | 16335974 | 22593126 | 23759643 | 17764224 | 8489474  | 33137507 |
| <b>PE 37:4</b>   | 1.99E+08 | 3.38E+08 | 7.28E+08 | 4.12E+08 | 3.76E+08 | 8.32E+08 |
| <b>PE 37:3</b>   | 2.12E+08 | 4.15E+08 | 7.48E+08 | 6.08E+08 | 3.54E+08 | 88273583 |
| <b>PE 37:2</b>   | 47306547 | 55011291 | 86251143 | 72799618 | 1.27E+08 | 27984598 |
| <b>PE 37:1</b>   | 1.34E+10 | 3.81E+10 | 6.71E+10 | 3.22E+10 | 3.3E+10  | 5.19E+10 |
| <b>PE 37:0</b>   | 1.35E+09 | 1.04E+09 | 1.27E+09 | 9.72E+08 | 5.55E+08 | 3E+09    |
| <b>PE 36:4</b>   | 7562982  | 14768415 | 19516495 | 15992180 | 8332670  | 64114614 |
| <b>PE 36:3-1</b> | 5484186  | 16301224 | 25882481 | 17591056 | 15810870 | 35770213 |
| <b>PE 36:2-1</b> | 1.27E+08 | 1.9E+08  | 2.51E+08 | 1.22E+08 | 1.15E+08 | 17355924 |
| <b>PE 36:1-2</b> | 6040531  | 6711157  | 4770750  | 4633710  | 2034035  | 13684400 |
| <b>PE 36:1-1</b> | 9.91E+08 | 1.83E+09 | 2.26E+09 | 1.27E+09 | 7.01E+08 | 3.31E+08 |
| <b>PE 36:0</b>   | 65021485 | 1.19E+08 | 1.71E+08 | 1.29E+08 | 76586384 | 8.76E+08 |
| <b>PE 35:5</b>   | 1449430  | 2466131  | 4199288  | 2490853  | 2938765  | 461298.2 |
| <b>PE 35:4</b>   | 9428717  | 20352157 | 24130935 | 7915315  | 6216439  | 31342971 |
| <b>PE 35:3</b>   | 23749152 | 10209645 | 20560198 | 19435180 | 15752531 | 1269296  |
| <b>PE 35:1</b>   | 4.81E+09 | 6.18E+09 | 7.43E+09 | 5.69E+09 | 7E+09    | 2.12E+09 |
| <b>PE 35:0</b>   | 6.41E+09 | 5.24E+09 | 5.98E+09 | 4.46E+09 | 2.83E+09 | 4.66E+09 |
| <b>PE 34:4</b>   | 3914546  | 11611234 | 25691978 | 14903728 | 16991462 | 50798585 |

---

|                    |          |          |          |          |          |          |
|--------------------|----------|----------|----------|----------|----------|----------|
| <b>PE 34:3-1</b>   | 2534290  | 3437714  | 4714285  | 2424640  | 2308116  | 4611580  |
| <b>PE 34:1</b>     | 15151549 | 24720689 | 40715262 | 22689023 | 12255570 | 918237.1 |
| <b>PE 33:0</b>     | 1.69E+09 | 2.64E+09 | 3.61E+09 | 2.15E+09 | 1.32E+09 | 4.22E+09 |
| <b>PE 32:0</b>     | 51771326 | 71369900 | 96255090 | 65634097 | 31314285 | 22448039 |
| <b>PE 31:1</b>     | 66575709 | 82764402 | 1.76E+08 | 1.23E+08 | 72219622 | 6914284  |
| <b>PE 31:0</b>     | 2.38E+08 | 2.19E+08 | 3.37E+08 | 2.38E+08 | 1.27E+08 | 4.68E+08 |
| <b>PE 28:0</b>     | 1328346  | 1971200  | 1686942  | 704635.1 | 387092.4 | 8992956  |
| <b>PC O-45:1</b>   | 13712739 | 12131875 | 17120909 | 15183130 | 34722179 | 2520212  |
| <b>PC O-45:0</b>   | 1.41E+08 | 49320554 | 58418881 | 1.19E+08 | 2.42E+08 | 6587933  |
| <b>PC O-44:3-2</b> | 4503198  | 3451615  | 2599472  | 2867566  | 3801607  | 12967669 |
| <b>PC O-44:2-1</b> | 1034233  | 717432.5 | 472642   | 533440.2 | 747258.3 | 2760448  |
| <b>PC O-44:0</b>   | 72635011 | 49975599 | 79716969 | 1.18E+08 | 1.99E+08 | 1816965  |
| <b>PC O-42:8</b>   | 8579400  | 6599594  | 5285786  | 6618710  | 6587023  | 18401318 |
| <b>PC O-42:7-2</b> | 2376906  | 2120348  | 1709841  | 1850182  | 1212064  | 2222629  |
| <b>PC O-42:6-1</b> | 652378.6 | 1546822  | 1355924  | 498202.9 | 762461.1 | 2110062  |
| <b>PC O-42:5-2</b> | 2471471  | 3034346  | 1939189  | 1234188  | 850119.2 | 533055.4 |
| <b>PC O-42:3-1</b> | 10349141 | 12794560 | 13549691 | 22046758 | 18662773 | 3923444  |
| <b>PC O-42:2-2</b> | 9002331  | 11889675 | 8363920  | 8934734  | 7997744  | 5242280  |
| <b>PC O-42:1-1</b> | 1519666  | 1789432  | 867698.5 | 773460.4 | 462133   | 1106728  |
| <b>PC O-42:0</b>   | 19328025 | 9970307  | 18949742 | 28025160 | 56820728 | 663425.7 |
| <b>PC O-40:8</b>   | 4793904  | 3819429  | 3469988  | 5280162  | 4347988  | 3540833  |
| <b>PC O-40:7</b>   | 23549448 | 34459555 | 19965916 | 13790467 | 12685096 | 3002999  |
| <b>PC O-40:6-2</b> | 11156857 | 32127507 | 24032289 | 27889843 | 36512849 | 26836934 |
| <b>PC O-40:6-1</b> | 1120258  | 3227776  | 5874403  | 6973163  | 6558810  | 12951029 |
| <b>PC O-40:5-2</b> | 6331650  | 5714364  | 5614062  | 6812476  | 7825414  | 842103.6 |



---

|                    |          |          |          |          |          |          |
|--------------------|----------|----------|----------|----------|----------|----------|
| <b>PC O-40:5-1</b> | 21795847 | 41344350 | 31384316 | 16467343 | 14958729 | 4196513  |
| <b>PC O-40:4-1</b> | 10283238 | 30318854 | 25105824 | 29484858 | 24326569 | 5532667  |
| <b>PC O-40:3-1</b> | 38172359 | 53700001 | 57119508 | 75378292 | 83828053 | 29287843 |
| <b>PC O-40:2-1</b> | 39687521 | 36737659 | 33724736 | 72512876 | 52227546 | 17806565 |
| <b>PC O-40:1-1</b> | 10514627 | 10463927 | 6892394  | 6177885  | 5477085  | 7486045  |
| <b>PC O-39:3</b>   | 1.33E+08 | 1.72E+08 | 1.46E+08 | 1.62E+08 | 1.76E+08 | 25946372 |
| <b>PC O-39:2</b>   | 5001868  | 7399500  | 4557298  | 4116546  | 3040859  | 3691322  |
| <b>PC O-39:1</b>   | 10720115 | 11949091 | 9962459  | 11351356 | 16375399 | 9241158  |
| <b>PC O-38:4-2</b> | 6823062  | 6337580  | 10179782 | 7694701  | 6171552  | 6091008  |
| <b>PC O-38:4-1</b> | 6349455  | 22799275 | 17953809 | 9054123  | 5724980  | 5590590  |
| <b>PC O-38:3-2</b> | 26454404 | 50115440 | 48564892 | 67860454 | 53309296 | 47593938 |
| <b>PC O-38:2-2</b> | 3950737  | 3998525  | 3831560  | 5819388  | 5729273  | 4804149  |
| <b>PC O-38:2-1</b> | 1921176  | 5379529  | 5781257  | 8385897  | 6690383  | 5633908  |
| <b>PC O-38:1-1</b> | 26583906 | 22412957 | 15717334 | 22612628 | 16565855 | 42546237 |
| <b>PC O-38:0</b>   | 2091653  | 2381738  | 854069.9 | 486278.3 | 237317.9 | 3363384  |
| <b>PC O-37:1-2</b> | 737323.7 | 1159568  | 948172.5 | 1061169  | 1021685  | 1830699  |
| <b>PC O-36:7</b>   | 2116968  | 1643572  | 1487114  | 584833.2 | 409799.7 | 929062.5 |
| <b>PC O-36:6-1</b> | 10514402 | 9168383  | 11074303 | 11678829 | 10459426 | 6024544  |
| <b>PC O-36:5-1</b> | 993230.2 | 1310986  | 2727349  | 2556054  | 1569638  | 3774333  |
| <b>PC O-36:3-2</b> | 1.46E+08 | 75377038 | 1.14E+08 | 1.63E+08 | 2.02E+08 | 78171302 |
| <b>PC O-36:3-1</b> | 9907077  | 21244933 | 10785965 | 8103328  | 6809028  | 3095949  |
| <b>PC O-36:2-2</b> | 1.18E+09 | 1.31E+09 | 1.44E+09 | 1.62E+09 | 1.57E+09 | 2.61E+09 |
| <b>PC O-36:2-1</b> | 78383718 | 1E+08    | 1.07E+08 | 93653431 | 1.08E+08 | 1.57E+08 |
| <b>PC O-36:1-2</b> | 1.9E+08  | 1.58E+08 | 1.3E+08  | 1.46E+08 | 1.2E+08  | 1.34E+09 |
| <b>PC O-36:1-1</b> | 1.49E+08 | 1.69E+08 | 1.84E+08 | 2.1E+08  | 2.01E+08 | 3.38E+08 |

---

|                    |          |          |          |          |          |          |
|--------------------|----------|----------|----------|----------|----------|----------|
| <b>PC O-36:0</b>   | 5882990  | 4093681  | 2166961  | 2726436  | 1564416  | 26602770 |
| <b>PC O-35:2-1</b> | 8.2E+08  | 2.42E+09 | 1.43E+09 | 7.13E+08 | 1.42E+09 | 1.43E+08 |
| <b>PC O-35:1-2</b> | 24347377 | 17710622 | 13799045 | 12622062 | 16774585 | 20666482 |
| <b>PC O-35:1-1</b> | 2.94E+08 | 1.17E+08 | 1.4E+08  | 2E+08    | 1.58E+08 | 5790835  |
| <b>PC O-34:5-1</b> | 6692156  | 4288667  | 1975333  | 2890173  | 1275615  | 5301506  |
| <b>PC O-34:3-2</b> | 11023027 | 14910820 | 10941964 | 10950618 | 9161525  | 4348875  |
| <b>PC O-34:1-2</b> | 3.44E+09 | 2.78E+09 | 2.44E+09 | 2.69E+09 | 2.39E+09 | 5.71E+09 |
| <b>PC O-34:1-1</b> | 65199193 | 51920473 | 51757655 | 35758500 | 57755643 | 54388643 |
| <b>PC O-34:0</b>   | 4.12E+08 | 3.32E+08 | 2.89E+08 | 3.23E+08 | 2.81E+08 | 6.86E+08 |
| <b>PC O-33:4</b>   | 4558150  | 4445621  | 5724796  | 6519236  | 4796958  | 6410624  |
| <b>PC O-33:2-2</b> | 48495825 | 54427380 | 64064726 | 68880061 | 44329530 | 9104757  |
| <b>PC O-33:1-2</b> | 2.19E+08 | 3.5E+08  | 3.34E+08 | 2.31E+08 | 3.46E+08 | 63698320 |
| <b>PC O-33:0</b>   | 5011225  | 3224330  | 4729091  | 6973052  | 8560215  | 2132450  |
| <b>PC O-32:4</b>   | 1053398  | 2938859  | 2815097  | 2640599  | 3040578  | 3878908  |
| <b>PC O-32:1-2</b> | 3011791  | 1891056  | 1614542  | 3454288  | 1986506  | 509607.1 |
| <b>PC O-32:0</b>   | 1.03E+08 | 74258758 | 60905395 | 68153945 | 61350907 | 1.22E+08 |
| <b>PC O-31:1-1</b> | 26454716 | 14244168 | 21058015 | 17894405 | 19775923 | 40237769 |
| <b>PC O-31:0</b>   | 47379035 | 93026841 | 87356359 | 80774856 | 84519232 | 25672056 |
| <b>PC O-30:1-2</b> | 53457410 | 69139999 | 44537833 | 37175768 | 26540259 | 2678823  |
| <b>PC 46:5</b>     | 1609487  | 1398895  | 1237931  | 1535653  | 1582402  | 2073505  |
| <b>PC 46:4</b>     | 1324506  | 2723927  | 3178117  | 2402421  | 3385640  | 4743009  |
| <b>PC 46:3</b>     | 1440733  | 1048419  | 1043635  | 1125059  | 1079405  | 1787859  |
| <b>PC 44:3</b>     | 11853863 | 7010070  | 5266993  | 5099814  | 3727755  | 1871099  |
| <b>PC 44:2</b>     | 16120427 | 7655866  | 3848350  | 2914737  | 2305866  | 8656573  |
| <b>PC 44:12</b>    | 2310691  | 2299348  | 3842125  | 3885106  | 4346705  | 2279407  |

---

|                   |          |          |          |          |          |          |
|-------------------|----------|----------|----------|----------|----------|----------|
| <b>PC 44:11-2</b> | 317554.3 | 464405.1 | 887024.6 | 422613.5 | 174648.8 | 3486168  |
| <b>PC 43:6</b>    | 2508399  | 5456718  | 4576626  | 2992771  | 2697303  | 2685500  |
| <b>PC 42:6</b>    | 5944017  | 6475162  | 4972298  | 6233553  | 6871349  | 2404917  |
| <b>PC 42:3-1</b>  | 73417470 | 61004218 | 56010399 | 76067055 | 57562251 | 7141238  |
| <b>PC 42:2-2</b>  | 1.47E+08 | 86101428 | 66063467 | 69121409 | 61508085 | 42570040 |
| <b>PC 42:1</b>    | 50084368 | 26759437 | 15410151 | 11829907 | 9953515  | 51268367 |
| <b>PC 41:4</b>    | 4997144  | 3450813  | 2055386  | 3351641  | 4240148  | 5050746  |
| <b>PC 41:2-1</b>  | 6487007  | 5822105  | 3838238  | 3162563  | 2077795  | 291957.9 |
| <b>PC 40:6-2</b>  | 6611363  | 11188592 | 13591210 | 26387177 | 27603079 | 7109776  |
| <b>PC 40:6-1</b>  | 12423331 | 64719784 | 21905774 | 9140669  | 5318677  | 2439752  |
| <b>PC 40:5-3</b>  | 16226148 | 12885933 | 8160405  | 4955110  | 2742448  | 1473534  |
| <b>PC 40:3</b>    | 1.29E+08 | 1.73E+08 | 1.62E+08 | 2E+08    | 1.56E+08 | 18885195 |
| <b>PC 40:2-1</b>  | 5.49E+08 | 3.95E+08 | 3.51E+08 | 3.96E+08 | 4.07E+08 | 3.1E+08  |
| <b>PC 40:1-2</b>  | 71615588 | 31642651 | 29272934 | 39990633 | 29896965 | 13162790 |
| <b>PC 40:1-1</b>  | 51694742 | 23339167 | 8842448  | 10809304 | 14124749 | 52377319 |
| <b>PC 40:0</b>    | 8088316  | 3407056  | 1832763  | 1685209  | 1157074  | 6153961  |
| <b>PC 39:8</b>    | 4017968  | 5631348  | 6341249  | 6658526  | 5920321  | 7710177  |
| <b>PC 39:6</b>    | 1373466  | 2411276  | 1910932  | 5228084  | 5926408  | 436787   |
| <b>PC 39:3</b>    | 1402012  | 8014427  | 5428029  | 4355026  | 3157133  | 659643.9 |
| <b>PC 38:8</b>    | 4767757  | 8799732  | 6914560  | 6444970  | 5560338  | 7550228  |
| <b>PC 38:5-1</b>  | 12771796 | 20897778 | 12122601 | 6116327  | 4315086  | 527640.7 |
| <b>PC 38:4-2</b>  | 33242932 | 1.91E+08 | 1.44E+08 | 47235712 | 39052974 | 1577520  |
| <b>PC 38:3</b>    | 32792521 | 37801354 | 40276512 | 26840679 | 38344936 | 6054648  |
| <b>PC 38:2-2</b>  | 71430185 | 1.04E+08 | 1.21E+08 | 1.63E+08 | 1.01E+08 | 25069640 |
| <b>PC 38:1-1</b>  | 2.24E+08 | 2.91E+08 | 2.55E+08 | 2.49E+08 | 3.26E+08 | 4.01E+08 |

---

|                  |          |          |          |          |          |          |
|------------------|----------|----------|----------|----------|----------|----------|
| <b>PC 37:7</b>   | 52262973 | 1.02E+08 | 1.17E+08 | 1.74E+08 | 1.72E+08 | 9802153  |
| <b>PC 37:6</b>   | 11599079 | 22241631 | 26223835 | 30477733 | 42777648 | 46789307 |
| <b>PC 37:5</b>   | 16689861 | 22364097 | 27217233 | 42516839 | 37127062 | 11836488 |
| <b>PC 37:2-2</b> | 3077786  | 4594720  | 3327238  | 3988236  | 5786103  | 845546.6 |
| <b>PC 37:1-2</b> | 19447888 | 22553122 | 27145990 | 27248210 | 42107349 | 14938910 |
| <b>PC 37:1-1</b> | 16551600 | 31645196 | 37727114 | 35345281 | 45102740 | 41925632 |
| <b>PC 37:0</b>   | 5263902  | 6862985  | 5720771  | 5083752  | 4182576  | 1710081  |
| <b>PC 36:4-1</b> | 19667725 | 39566593 | 24978781 | 14288154 | 11599729 | 2798811  |
| <b>PC 36:2-2</b> | 1.88E+08 | 2.99E+08 | 2.49E+08 | 3.07E+08 | 1.93E+08 | 32557971 |
| <b>PC 36:0</b>   | 2448647  | 2494264  | 2424746  | 3003088  | 2179281  | 2793802  |
| <b>PC 35:5-2</b> | 7511702  | 10251816 | 10881865 | 16376474 | 15790970 | 12381510 |
| <b>PC 35:5-1</b> | 9574529  | 18563579 | 27599788 | 30980216 | 46691351 | 13545992 |
| <b>PC 35:4</b>   | 552807   | 808527.4 | 960251.1 | 1116733  | 1340645  | 855272.4 |
| <b>PC 35:1</b>   | 3468981  | 3634703  | 4244698  | 3433403  | 5409481  | 2116770  |
| <b>PC 35:0-1</b> | 11748405 | 7539245  | 10640297 | 10744060 | 11148203 | 19218738 |
| <b>PC 34:2</b>   | 76855057 | 43270984 | 1.56E+08 | 36216272 | 1.44E+08 | 1503452  |
| <b>PC 34:1</b>   | 1039119  | 473197.1 | 357314.5 | 466922.8 | 384899.6 | 5825466  |
| <b>PC 34:0</b>   | 38123431 | 22090915 | 26513341 | 28284613 | 32228380 | 4916871  |
| <b>PC 33:5</b>   | 2470440  | 1925046  | 2266653  | 2182317  | 3318836  | 815972.9 |
| <b>PC 33:4</b>   | 1694323  | 630307.8 | 661743.6 | 684008.8 | 972886.6 | 925801.3 |
| <b>PC 33:1</b>   | 4410130  | 5487052  | 4576164  | 2599462  | 3154355  | 4014733  |
| <b>PC 33:0-1</b> | 5147807  | 2327418  | 1262248  | 2126367  | 1074277  | 2968482  |
| <b>PC 32:3</b>   | 12105236 | 12943719 | 16365424 | 12964159 | 14727897 | 1001072  |
| <b>PC 32:1</b>   | 3.02E+08 | 1.35E+08 | 2.54E+08 | 3.05E+08 | 1.92E+08 | 6997214  |
| <b>PC 30:2</b>   | 87421446 | 63508355 | 1.14E+08 | 1.37E+08 | 1.3E+08  | 5005190  |

---

|                     |          |          |          |          |          |          |
|---------------------|----------|----------|----------|----------|----------|----------|
| <b>PC 29:1</b>      | 4420692  | 5358652  | 7096782  | 4562332  | 4260276  | 5115764  |
| <b>PC 29:0</b>      | 7641258  | 4351472  | 3176714  | 4721392  | 1933188  | 559982.7 |
| <b>PC 28:1</b>      | 14060808 | 8970601  | 13641241 | 14821398 | 9520901  | 2846611  |
| <b>PC 26:0</b>      | 18231033 | 1625497  | 1637443  | 1455670  | 727451.7 | 1975268  |
| <b>LPE O-20:1</b>   | 989379.1 | 2103777  | 2275393  | 1468844  | 1225409  | 1146683  |
| <b>LPE O-18:2</b>   | 79846254 | 4.81E+08 | 3.43E+08 | 2.8E+08  | 5.17E+08 | 94319632 |
| <b>LPE O-16:1</b>   | 2041030  | 1926979  | 1743325  | 1366958  | 913184.5 | 1016674  |
| <b>LPE 24:1</b>     | 1172833  | 1336626  | 1439894  | 1008821  | 839296.8 | 797600.6 |
| <b>LPE 22:2</b>     | 1843897  | 3687842  | 3832383  | 3188737  | 1999020  | 255572.4 |
| <b>LPE 22:1</b>     | 2917465  | 6016894  | 14184991 | 4277349  | 7296743  | 12814255 |
| <b>LPE 21:0</b>     | 17982781 | 5979904  | 5213690  | 2847233  | 4219445  | 864981.2 |
| <b>LPE 20:5</b>     | 3666525  | 3836802  | 2313007  | 970771.3 | 571370.6 | 381482.9 |
| <b>LPE 20:4</b>     | 56658567 | 65651415 | 47793841 | 18964351 | 13859114 | 1419637  |
| <b>LPE 20:1</b>     | 6181803  | 12510369 | 15711818 | 7560446  | 5352720  | 1383111  |
| <b>LPE 20:0</b>     | 448459   | 590249.4 | 791175.1 | 395799.5 | 392574.7 | 1092561  |
| <b>LPE 18:4</b>     | 7.1E+08  | 1.29E+09 | 8.42E+08 | 1.01E+09 | 9.82E+08 | 9.43E+08 |
| <b>LPE 17:2</b>     | 3891328  | 19908628 | 8178863  | 4206025  | 3191641  | 11686558 |
| <b>LPE 16:1</b>     | 42185253 | 28746709 | 32459805 | 19882650 | 22958938 | 2855733  |
| <b>LPE 14:0</b>     | 876215.2 | 786443.9 | 1116053  | 519081.6 | 603584.4 | 305273.1 |
| <b>LPE 12:0</b>     | 1.02E+08 | 2.5E+08  | 2.93E+08 | 1.6E+08  | 1.92E+08 | 1.36E+08 |
| <b>LPC O-20:2</b>   | 717744.1 | 887042   | 761767.2 | 727869.8 | 480531.5 | 6639026  |
| <b>LPC O-18:2-2</b> | 2314389  | 1311252  | 1311551  | 1197544  | 877479.8 | 1888049  |
| <b>LPC O-18:2-1</b> | 2595252  | 935701.7 | 538417.7 | 499998.7 | 334755.5 | 957274   |
| <b>LPC O-18:1</b>   | 1842642  | 5813942  | 1983658  | 1108793  | 604724.1 | 33018382 |
| <b>LPC O-18:0</b>   | 473389.9 | 724066.8 | 398825.8 | 388482.2 | 290497.4 | 11984573 |

---

|                   |          |          |          |          |          |          |
|-------------------|----------|----------|----------|----------|----------|----------|
| <b>LPC O-16:1</b> | 1.79E+08 | 1.54E+08 | 1.24E+08 | 91204624 | 49817332 | 50832204 |
| <b>LPC O-16:0</b> | 32108992 | 13959948 | 14461134 | 17307393 | 15607341 | 16448179 |
| <b>LPC 26:0</b>   | 7873540  | 3569697  | 1579157  | 980721.1 | 213935.1 | 5656838  |
| <b>LPC 24:1</b>   | 49783729 | 22603628 | 12892105 | 17831079 | 8192159  | 2936292  |
| <b>LPC 24:0</b>   | 21014315 | 3833134  | 1340081  | 1070884  | 710930.5 | 2040433  |
| <b>LPC 22:5-1</b> | 9892216  | 9086702  | 6218800  | 2928467  | 1444110  | 709663.4 |
| <b>LPC 22:4</b>   | 7594307  | 7142666  | 6977123  | 4874529  | 3726801  | 9650761  |
| <b>LPC 22:3</b>   | 5114283  | 7390399  | 6627143  | 3271895  | 2050985  | 265008.6 |
| <b>LPC 22:1</b>   | 9275394  | 7131051  | 7439543  | 9969957  | 3316243  | 1459207  |
| <b>LPC 22:0</b>   | 24585276 | 7710736  | 10338485 | 11833434 | 7504292  | 25463273 |
| <b>LPC 20:3</b>   | 28073982 | 21612873 | 22620823 | 28997196 | 8655026  | 8260784  |
| <b>LPC 20:2</b>   | 25609268 | 14790577 | 23050859 | 10193674 | 7114974  | 2588982  |
| <b>LPC 20:1</b>   | 47139125 | 52026495 | 47263210 | 30755142 | 20815685 | 18167568 |
| <b>LPC 20:0</b>   | 3764992  | 2944230  | 2585211  | 3545557  | 1373564  | 6170592  |
| <b>LPC 19:1</b>   | 2428349  | 4741976  | 4557708  | 5401827  | 4633873  | 9604686  |
| <b>LPC 18:4-1</b> | 17799047 | 12282939 | 11794615 | 11229931 | 8172542  | 1666435  |
| <b>LPC 18:1</b>   | 1.83E+09 | 1.65E+09 | 1.38E+09 | 1.23E+09 | 8.15E+08 | 6.3E+08  |
| <b>LPC 18:0</b>   | 4.24E+08 | 4.83E+08 | 3.28E+08 | 4.05E+08 | 2.13E+08 | 63154435 |
| <b>LPC 17:1</b>   | 15579956 | 15433298 | 9958423  | 8418434  | 5178219  | 1065060  |
| <b>LPC 17:0</b>   | 8459687  | 10951254 | 7815665  | 5092918  | 4449365  | 1068475  |
| <b>LPC 16:1</b>   | 3.89E+08 | 3.09E+08 | 2.75E+08 | 2.66E+08 | 2E+08    | 38919559 |
| <b>LPC 14:1</b>   | 2559335  | 1813817  | 2718179  | 2279926  | 1311499  | 236171.1 |
| <b>LPC 14:0</b>   | 46038787 | 39511133 | 33458152 | 30889708 | 18916379 | 9927217  |
| <b>LPC 12:0</b>   | 48577816 | 78007052 | 75194684 | 65127840 | 39830825 | 1.11E+08 |
| <b>DG 33:0-1</b>  | 493854.3 | 2072075  | 1760270  | 980370.7 | 1447781  | 7564437  |

---

|                  |          |          |          |          |          |          |
|------------------|----------|----------|----------|----------|----------|----------|
| <b>DG 34:0-3</b> | 61680000 | 48805671 | 56749750 | 58592165 | 96464188 | 14148514 |
| <b>DG 34:1-2</b> | 15508398 | 19679736 | 22663784 | 32644965 | 79888263 | 2383410  |
| <b>DG 34:2-1</b> | 1.69E+08 | 1.2E+08  | 2.67E+08 | 3.7E+08  | 9.5E+08  | 51668799 |
| <b>DG 35:0-3</b> | 43583189 | 71735107 | 66205759 | 44308207 | 33447310 | 1183726  |
| <b>DG 35:1-1</b> | 5523282  | 8212679  | 9189818  | 7802079  | 8440289  | 2429573  |
| <b>DG 35:2-1</b> | 15769654 | 13601268 | 16247340 | 15705366 | 19276061 | 2212434  |
| <b>DG 36:0-1</b> | 1101701  | 1229799  | 1046724  | 641965.8 | 605151.6 | 7034909  |
| <b>DG 36:0-2</b> | 39550070 | 34757436 | 40822801 | 45016960 | 47778012 | 86789277 |
| <b>DG 36:1-1</b> | 3.99E+08 | 3.56E+08 | 4.12E+08 | 4.49E+08 | 4.82E+08 | 8.61E+08 |
| <b>DG 36:1-2</b> | 7808073  | 6963072  | 9402991  | 8753430  | 8963028  | 9480688  |
| <b>DG 36:1-3</b> | 14748061 | 10566471 | 15019691 | 28968448 | 28251993 | 3282849  |
| <b>DG 36:1-4</b> | 2.05E+08 | 1.35E+08 | 1.81E+08 | 2.46E+08 | 3.54E+08 | 2.14E+08 |
| <b>DG 36:2-1</b> | 10423674 | 4583799  | 7265817  | 9209241  | 9309387  | 6087132  |
| <b>DG 36:2-2</b> | 1.48E+08 | 1.06E+08 | 1.54E+08 | 2.77E+08 | 2.84E+08 | 31050614 |
| <b>DG 36:2-5</b> | 18335437 | 7038848  | 8874090  | 17672518 | 15954296 | 1753737  |
| <b>DG 36:3-1</b> | 1.24E+08 | 70890418 | 95107912 | 1E+08    | 1.61E+08 | 29969597 |
| <b>DG 36:3-2</b> | 1.86E+08 | 70335819 | 96147017 | 1.86E+08 | 1.66E+08 | 3705694  |
| <b>DG 37:1-1</b> | 3260168  | 1626150  | 1496769  | 936998.2 | 1233356  | 1059617  |
| <b>DG 37:2-1</b> | 11826918 | 13914629 | 14299242 | 13168586 | 12895483 | 3348312  |
| <b>DG 37:2-3</b> | 6960194  | 13205550 | 4639382  | 4893672  | 4350807  | 33578356 |
| <b>DG 37:3-2</b> | 1644375  | 1823328  | 2289247  | 2335558  | 3240552  | 2969601  |
| <b>DG 38:0-2</b> | 2016454  | 1889694  | 1917664  | 1330524  | 1708625  | 9786499  |
| <b>DG 38:1-1</b> | 14382484 | 21039523 | 22903083 | 15119659 | 18394084 | 1E+08    |
| <b>DG 38:1-2</b> | 4144169  | 4547814  | 6714169  | 10838374 | 8396925  | 6649552  |
| <b>DG 38:1-3</b> | 19223279 | 18102141 | 24628617 | 24446363 | 32162571 | 38154567 |

---

|                   |          |          |          |          |          |          |
|-------------------|----------|----------|----------|----------|----------|----------|
| <b>DG 38:2-1</b>  | 41206860 | 44306090 | 60995304 | 1E+08    | 78915216 | 75840803 |
| <b>DG 38:2-2</b>  | 1.72E+08 | 1.7E+08  | 2.07E+08 | 2.15E+08 | 2.95E+08 | 3.42E+08 |
| <b>DG 38:2-3</b>  | 25304326 | 19223152 | 25141595 | 35979890 | 30913074 | 6782456  |
| <b>DG 38:2-4</b>  | 1.04E+08 | 56843339 | 65297062 | 1.68E+08 | 1.27E+08 | 6715017  |
| <b>DG 38:3-1</b>  | 9.61E+08 | 5.22E+08 | 5.95E+08 | 1.5E+09  | 1.11E+09 | 53894281 |
| <b>DG 38:3-2</b>  | 2.37E+08 | 1.67E+08 | 2.04E+08 | 3.38E+08 | 3.05E+08 | 61920974 |
| <b>DG 38:4-1</b>  | 1.71E+08 | 84610811 | 1.24E+08 | 1.42E+08 | 90216009 | 15002075 |
| <b>DG 38:4-2</b>  | 1.79E+09 | 1.19E+09 | 8.92E+08 | 9.12E+08 | 8.08E+08 | 66876859 |
| <b>DG 38:5-1</b>  | 2.91E+08 | 1.8E+08  | 1.54E+08 | 1.61E+08 | 1.21E+08 | 9080892  |
| <b>DG 40:1-1</b>  | 7294556  | 7363899  | 7754495  | 4355334  | 4798519  | 7310700  |
| <b>DG 40:1-2</b>  | 3806725  | 4257099  | 6030288  | 4400697  | 7111950  | 4571545  |
| <b>DG 40:2-1</b>  | 32217266 | 36018933 | 47116333 | 37273118 | 56982221 | 37444760 |
| <b>DG 40:3-1</b>  | 18433983 | 24034401 | 31414892 | 41525667 | 51354110 | 11831508 |
| <b>DG 40:4-1</b>  | 78351116 | 71449525 | 63383731 | 66836020 | 43558672 | 8396137  |
| <b>DG 40:5-2</b>  | 77955121 | 65382142 | 50038555 | 73055266 | 33063579 | 2083561  |
| <b>DG 40:9-1</b>  | 26561218 | 17372713 | 18581252 | 12110502 | 8591358  | 23764070 |
| <b>DG 41:2-1</b>  | 3675715  | 2352858  | 3728996  | 729237.8 | 1458701  | 38572359 |
| <b>DG 41:5-1</b>  | 9302153  | 6199504  | 6055615  | 4981125  | 3923979  | 9372697  |
| <b>DG 41:6-1</b>  | 37701850 | 72508186 | 65923286 | 44257040 | 39318205 | 1.73E+08 |
| <b>DG 42:10-1</b> | 1.23E+08 | 58997176 | 70415344 | 78928080 | 39138190 | 19842345 |
| <b>DG 42:1-1</b>  | 5284952  | 2997473  | 2360753  | 1581273  | 1568247  | 16873531 |
| <b>DG 42:1-2</b>  | 3354027  | 2786229  | 3314367  | 2537139  | 3100986  | 2457045  |
| <b>DG 42:2-1</b>  | 26287832 | 22932293 | 25533401 | 19561168 | 22972658 | 23760446 |
| <b>DG 42:3-1</b>  | 10041658 | 11557274 | 17798969 | 16783766 | 22007314 | 2268732  |
| <b>DG 42:9-2</b>  | 1.73E+08 | 1.87E+08 | 1.64E+08 | 1.17E+08 | 94876833 | 2.14E+08 |



---

|                  |          |          |          |          |          |          |
|------------------|----------|----------|----------|----------|----------|----------|
| <b>DG 43:6</b>   | 3246606  | 4619069  | 5888967  | 5341935  | 3638316  | 19136219 |
| <b>DG 44:0-1</b> | 2996520  | 1560204  | 1898333  | 1661638  | 1144147  | 3591241  |
| <b>DG 44:1-1</b> | 4151703  | 1654200  | 2296944  | 2285741  | 2400830  | 1731949  |
| <b>DG 44:12</b>  | 2.82E+09 | 1.42E+09 | 2.52E+09 | 2.28E+09 | 1.41E+09 | 1.72E+08 |
| <b>DG 44:2-1</b> | 6708784  | 4112879  | 4061669  | 2659355  | 2565345  | 5479041  |
| <b>DG 44:3-1</b> | 2730914  | 2688349  | 3547353  | 2827620  | 3534568  | 376233.5 |
| <b>DG 44:5-1</b> | 975310.5 | 874275.7 | 994895.4 | 626834.2 | 823514.7 | 2745655  |
| <b>DG 44:9-2</b> | 7.16E+08 | 4.9E+08  | 3.91E+08 | 2.68E+08 | 2.24E+08 | 2.65E+08 |
| <b>DG 45:5-1</b> | 5582085  | 9579600  | 7840007  | 5678491  | 5307375  | 28481535 |
| <b>DG 46:0-1</b> | 11530347 | 7815995  | 8640824  | 7882439  | 7881571  | 23265399 |
| <b>DG 46:1-1</b> | 29482383 | 14638018 | 24242960 | 23818094 | 25557681 | 12781377 |
| <b>DG 47:1-3</b> | 907829.9 | 562798.6 | 623096.6 | 596337.9 | 694130.5 | 2545997  |
| <b>DG 48:1-3</b> | 1.16E+08 | 71427137 | 1.12E+08 | 1.13E+08 | 1.23E+08 | 90155741 |
| <b>DG 48:2-3</b> | 74447562 | 38146028 | 77287325 | 89852708 | 1.1E+08  | 10065961 |
| <b>TG 40:0</b>   | 745392.7 | 480712.9 | 836678.4 | 626222   | 734503.8 | 2147256  |
| <b>TG 42:0-3</b> | 6744592  | 4864252  | 5651251  | 6842679  | 7857406  | 8631606  |
| <b>TG 42:1-1</b> | 3543199  | 2008413  | 3356850  | 4007877  | 4350444  | 3938812  |
| <b>TG 43:0-1</b> | 1058424  | 1609002  | 1751836  | 1557698  | 1453377  | 6671293  |
| <b>TG 43:1</b>   | 989308.7 | 1096908  | 1173484  | 1083702  | 1002784  | 3298901  |
| <b>TG 44:0-1</b> | 48875493 | 35244493 | 37176549 | 47983032 | 62080844 | 33153444 |
| <b>TG 44:0-2</b> | 5183007  | 3175005  | 4379702  | 5756106  | 7964084  | 2462757  |
| <b>TG 44:2-2</b> | 5927397  | 5505258  | 9465772  | 9887765  | 13219719 | 4817377  |
| <b>TG 45:0-2</b> | 631817.8 | 765604.3 | 919997.9 | 939443.2 | 1129018  | 789128.7 |
| <b>TG 45:1-2</b> | 5166685  | 6316846  | 7368279  | 7851100  | 8441514  | 19889666 |
| <b>TG 45:2</b>   | 2119394  | 2116480  | 2527058  | 2725807  | 2595296  | 7845994  |

---

|                  |          |          |          |          |          |          |
|------------------|----------|----------|----------|----------|----------|----------|
| <b>TG 46:0</b>   | 1.9E+08  | 1.74E+08 | 1.78E+08 | 2.36E+08 | 3E+08    | 92640567 |
| <b>TG 46:1</b>   | 3.14E+08 | 1.93E+08 | 2.48E+08 | 3.5E+08  | 5.44E+08 | 92036769 |
| <b>TG 46:2-2</b> | 91081469 | 55334988 | 88042290 | 1.24E+08 | 1.99E+08 | 25290819 |
| <b>TG 46:3-4</b> | 7009606  | 6648027  | 12235753 | 17843667 | 25296901 | 1465843  |
| <b>TG 47:0</b>   | 11618185 | 20389779 | 19620533 | 21279223 | 20338665 | 34299329 |
| <b>TG 47:1-1</b> | 24906253 | 29888147 | 32782396 | 41364116 | 46582477 | 43023149 |
| <b>TG 47:2-1</b> | 11041962 | 11289326 | 14437488 | 17473740 | 20159408 | 21864086 |
| <b>TG 48:0-1</b> | 3.06E+08 | 3.74E+08 | 3.16E+08 | 4.5E+08  | 5.02E+08 | 2.22E+08 |
| <b>TG 48:0-2</b> | 2.08E+08 | 1.72E+08 | 1.94E+08 | 2.68E+08 | 3.91E+08 | 54577076 |
| <b>TG 48:1-1</b> | 1.23E+09 | 1.01E+09 | 1.13E+09 | 1.6E+09  | 2.32E+09 | 3.26E+08 |
| <b>TG 48:1-2</b> | 1.23E+08 | 72727489 | 1.08E+08 | 1.55E+08 | 2.66E+08 | 16322325 |
| <b>TG 48:2-1</b> | 6.91E+08 | 4.05E+08 | 6.18E+08 | 9.19E+08 | 1.57E+09 | 95266799 |
| <b>TG 49:0-1</b> | 10243122 | 13410386 | 13502442 | 17552693 | 18612564 | 7194040  |
| <b>TG 49:0-2</b> | 9912400  | 19798221 | 15348389 | 16425822 | 15058391 | 22220487 |
| <b>TG 49:1-1</b> | 56770579 | 76237779 | 78209704 | 98827586 | 1.11E+08 | 46983858 |
| <b>TG 49:2-4</b> | 47700899 | 48914822 | 60723701 | 81530011 | 99423551 | 33387504 |
| <b>TG 49:3-3</b> | 10174499 | 10048153 | 13274595 | 18115299 | 23178546 | 6101975  |
| <b>TG 50:0-1</b> | 2.1E+08  | 2.56E+08 | 1.88E+08 | 2.71E+08 | 2.61E+08 | 3.69E+08 |
| <b>TG 50:0-2</b> | 3.38E+08 | 3.43E+08 | 3.68E+08 | 4.84E+08 | 6.49E+08 | 2E+08    |
| <b>TG 50:1</b>   | 4.16E+08 | 3.75E+08 | 4.79E+08 | 6.97E+08 | 9.97E+08 | 1.17E+08 |
| <b>TG 50:2-1</b> | 2.27E+09 | 2.07E+09 | 2.61E+09 | 3.78E+09 | 5.51E+09 | 6.37E+08 |
| <b>TG 50:3-1</b> | 6.14E+08 | 3.71E+08 | 6.1E+08  | 9.72E+08 | 1.8E+09  | 57470674 |
| <b>TG 50:4-1</b> | 24330484 | 13014378 | 20236690 | 29737340 | 55191532 | 3223413  |
| <b>TG 50:4-2</b> | 36235415 | 23010099 | 26143453 | 59282023 | 56906469 | 1611123  |
| <b>TG 51:0-1</b> | 17200640 | 14954629 | 19779245 | 38587229 | 32627435 | 12133902 |

---

|                  |          |          |          |          |          |          |
|------------------|----------|----------|----------|----------|----------|----------|
| <b>TG 51:1-1</b> | 53851639 | 75596467 | 70913830 | 85649428 | 85224184 | 38744725 |
| <b>TG 51:2-1</b> | 98935306 | 1.14E+08 | 1.23E+08 | 1.69E+08 | 1.93E+08 | 35146593 |
| <b>TG 51:3-1</b> | 36631404 | 38970277 | 46837896 | 66205309 | 82519392 | 9832768  |
| <b>TG 52:0-1</b> | 2.19E+08 | 2.35E+08 | 2.2E+08  | 2.8E+08  | 3.15E+08 | 4.21E+08 |
| <b>TG 52:1-1</b> | 7.43E+08 | 7.19E+08 | 8.75E+08 | 1.17E+09 | 1.58E+09 | 4.88E+08 |
| <b>TG 52:1-2</b> | 1.11E+09 | 1.2E+09  | 1.13E+09 | 1.43E+09 | 1.62E+09 | 2.15E+09 |
| <b>TG 52:2-1</b> | 3.81E+09 | 3.68E+09 | 4.45E+09 | 6.06E+09 | 7.77E+09 | 2.48E+09 |
| <b>TG 52:2-2</b> | 4.2E+08  | 2.99E+08 | 4.28E+08 | 6.94E+08 | 1.13E+09 | 1.07E+08 |
| <b>TG 52:3-1</b> | 2E+09    | 1.54E+09 | 2.17E+09 | 3.38E+09 | 5.37E+09 | 5.15E+08 |
| <b>TG 52:4-4</b> | 2.13E+08 | 1.04E+08 | 1.24E+08 | 1.64E+08 | 3.81E+08 | 84023726 |
| <b>TG 53:0</b>   | 956182.5 | 1376917  | 1253542  | 2635859  | 3241254  | 3660227  |
| <b>TG 53:1-1</b> | 16531343 | 23552818 | 22052677 | 26808916 | 29233224 | 10182345 |
| <b>TG 53:1-3</b> | 18466325 | 27822365 | 23247631 | 28085294 | 26163803 | 27770640 |
| <b>TG 53:2-3</b> | 20760945 | 24682230 | 28100471 | 34143034 | 38222435 | 7417009  |
| <b>TG 53:2-4</b> | 77915262 | 99059961 | 96530454 | 1.3E+08  | 1.38E+08 | 41598568 |
| <b>TG 54:0-1</b> | 47624843 | 49629853 | 44511879 | 60191171 | 60357751 | 3.61E+08 |
| <b>TG 54:1-1</b> | 3.1E+08  | 2.97E+08 | 3.29E+08 | 4.94E+08 | 5.88E+08 | 8.84E+08 |
| <b>TG 54:2-1</b> | 5.52E+08 | 5.41E+08 | 6.46E+08 | 9.3E+08  | 1.18E+09 | 6.03E+08 |
| <b>TG 54:2-2</b> | 1.48E+09 | 1.42E+09 | 1.56E+09 | 2.34E+09 | 2.79E+09 | 4.25E+09 |
| <b>TG 54:3-2</b> | 2.45E+09 | 2.57E+09 | 3.08E+09 | 4.42E+09 | 5.67E+09 | 2.91E+09 |
| <b>TG 54:4-1</b> | 3.39E+08 | 2.69E+08 | 3.35E+08 | 5.7E+08  | 6.95E+08 | 1.59E+08 |
| <b>TG 54:5-1</b> | 87584455 | 61775552 | 41581687 | 63470166 | 36283627 | 92957559 |
| <b>TG 54:5-2</b> | 5177788  | 4936223  | 3069640  | 3021978  | 2592557  | 20007743 |
| <b>TG 54:6-3</b> | 17733323 | 16667516 | 10924306 | 12508070 | 9584473  | 62716760 |
| <b>TG 54:6-6</b> | 33921141 | 34661352 | 34521701 | 29822488 | 32271257 | 14385479 |

---

|                            |          |          |          |          |          |          |
|----------------------------|----------|----------|----------|----------|----------|----------|
| <b>TG 54:7-4</b>           | 2030530  | 1891505  | 1358375  | 1340891  | 1028092  | 5160351  |
| <b>TG 55:1-3</b>           | 3291419  | 4894112  | 3691380  | 4331822  | 3892614  | 11401042 |
| <b>TG 55:2-1/TG 55:2-4</b> | 13200436 | 24351373 | 21336835 | 20872351 | 28852268 | 16133525 |
| <b>TG 55:3-2</b>           | 35183508 | 45444852 | 44335864 | 62532279 | 67432570 | 16235429 |
| <b>TG 56:0-1</b>           | 2694895  | 2497985  | 1736691  | 2214496  | 1397659  | 34154860 |
| <b>TG 56:0-2</b>           | 9593982  | 9709275  | 8028006  | 10854212 | 10325526 | 1.24E+08 |
| <b>TG 56:1-1</b>           | 49962580 | 52868917 | 51626050 | 79304269 | 90395836 | 3.84E+08 |
| <b>TG 56:1-4</b>           | 44199041 | 43988962 | 36380931 | 48771443 | 46785133 | 5.68E+08 |
| <b>TG 56:2-1</b>           | 1.12E+08 | 1.15E+08 | 1.34E+08 | 2.25E+08 | 2.84E+08 | 3.93E+08 |
| <b>TG 56:2-3</b>           | 2.25E+08 | 2.34E+08 | 2.32E+08 | 3.53E+08 | 4.03E+08 | 1.71E+09 |
| <b>TG 56:3-1</b>           | 56810392 | 47050779 | 62728092 | 90673754 | 1.04E+08 | 39135941 |
| <b>TG 56:3-2</b>           | 5.06E+08 | 5.13E+08 | 6.03E+08 | 1E+09    | 1.27E+09 | 1.74E+09 |
| <b>TG 56:4-2</b>           | 1.94E+08 | 1.98E+08 | 2.08E+08 | 3.23E+08 | 3.73E+08 | 1.36E+08 |
| <b>TG 56:4-3</b>           | 36382831 | 39427739 | 41159339 | 45989598 | 61303128 | 7970802  |
| <b>TG 56:5-5</b>           | 1.45E+08 | 1.47E+08 | 1.39E+08 | 1.89E+08 | 1.98E+08 | 21200138 |
| <b>TG 56:6-3</b>           | 68264364 | 70884687 | 54853057 | 57917223 | 41958119 | 8313792  |
| <b>TG 57:1</b>             | 1371602  | 1751015  | 1260365  | 1347536  | 1074205  | 3817029  |
| <b>TG 57:2-3</b>           | 5509749  | 7069246  | 6024067  | 7324425  | 7156196  | 6341381  |
| <b>TG 57:3-1</b>           | 8875469  | 12661893 | 11628060 | 16553442 | 16610101 | 4596525  |
| <b>TG 57:3-2</b>           | 1.4E+08  | 2.17E+08 | 2.12E+08 | 2.81E+08 | 2.94E+08 | 5.29E+08 |
| <b>TG 58:0-1</b>           | 4926955  | 3722503  | 2761395  | 3434955  | 2870702  | 43746179 |
| <b>TG 58:1-1</b>           | 20565906 | 16238719 | 11853126 | 15314192 | 12840092 | 1.88E+08 |
| <b>TG 58:2-1</b>           | 28911145 | 25566304 | 34138938 | 50180439 | 59203002 | 88144422 |
| <b>TG 58:2-3</b>           | 95004072 | 82498095 | 74720626 | 1.09E+08 | 1.12E+08 | 5.02E+08 |
| <b>TG 58:3-1</b>           | 17273384 | 19248471 | 22554196 | 35232663 | 38355789 | 17523500 |

---

|                            |          |          |          |          |          |          |
|----------------------------|----------|----------|----------|----------|----------|----------|
| <b>TG 58:3-3</b>           | 1.32E+08 | 1.34E+08 | 1.4E+08  | 2.36E+08 | 2.76E+08 | 5.05E+08 |
| <b>TG 58:4-3</b>           | 72105586 | 78706978 | 89471168 | 1.44E+08 | 1.52E+08 | 71606950 |
| <b>TG 58:5-3</b>           | 55048223 | 54916126 | 60231698 | 80076150 | 77974753 | 14879770 |
| <b>TG 60:1</b>             | 9729759  | 7111071  | 5612173  | 8066214  | 6874030  | 59850607 |
| <b>TG 60:2-2</b>           | 19291804 | 15694818 | 14271457 | 17620403 | 23240105 | 55924723 |
| <b>TG 60:2-3</b>           | 37906603 | 27534542 | 21668085 | 31369444 | 27605422 | 2.31E+08 |
| <b>TG 60:3-1</b>           | 7973025  | 7959416  | 8049890  | 13498033 | 13799070 | 5489686  |
| <b>TG 60:3-3</b>           | 74573959 | 59994351 | 57008388 | 90568984 | 92080624 | 2.2E+08  |
| <b>TG 60:4</b>             | 30486483 | 30625224 | 31987615 | 52802851 | 52585380 | 29662095 |
| <b>TG 62:2-1</b>           | 6492479  | 4286319  | 2993196  | 3963661  | 3721623  | 66908443 |
| <b>TG 62:7</b>             | 2013452  | 3184382  | 2872708  | 1590306  | 1228450  | 31018996 |
| <b>TG 64:3</b>             | 2408344  | 1724431  | 1549046  | 2240031  | 1905675  | 12790879 |
| <b>TG(e) 56:1</b>          | 5740712  | 6921577  | 6535056  | 15039321 | 13652634 | 30829262 |
| <b>TG(e) 56:2</b>          | 8202508  | 9669074  | 14484833 | 28173379 | 27982872 | 18410603 |
| <b>TG(e)48:0</b>           | 25789044 | 20268412 | 21011817 | 30274004 | 29088381 | 2.1E+08  |
| <b>TG(e)50:0</b>           | 44104443 | 34163614 | 43552818 | 70251957 | 68271985 | 1.54E+08 |
| <b>TG(e)50:1</b>           | 61019993 | 42912612 | 66865298 | 1.21E+08 | 1.31E+08 | 53795018 |
| <b>TG(e)52:1</b>           | 1.36E+08 | 1.14E+08 | 1.39E+08 | 2.25E+08 | 1.96E+08 | 9.71E+08 |
| <b>TG(e)52:3</b>           | 1.85E+08 | 1.42E+08 | 2.45E+08 | 4.83E+08 | 5.55E+08 | 95014000 |
| <b>TG(e)54:2/TG(p)54:2</b> | 1.24E+08 | 1.22E+08 | 1.66E+08 | 3.03E+08 | 2.89E+08 | 5.42E+08 |
| <b>TG(p) 54:1</b>          | 22904171 | 23917921 | 27208223 | 43551067 | 35260939 | 3.04E+08 |
| <b>TG(p) 56:3</b>          | 39095518 | 44845566 | 64777920 | 1.27E+08 | 1.28E+08 | 82903469 |
| <b>TG(P)50:1</b>           | 2.43E+08 | 1.94E+08 | 2.4E+08  | 3.94E+08 | 3.82E+08 | 8.81E+08 |
| <b>TG(P)50:2</b>           | 15552281 | 12930635 | 16529762 | 34243312 | 40842518 | 12655225 |
| <b>TG(P)52:1</b>           | 1.13E+08 | 95003023 | 1.38E+08 | 2.44E+08 | 2.56E+08 | 1.95E+08 |

---

|                  |          |          |          |          |          |          |
|------------------|----------|----------|----------|----------|----------|----------|
| <b>TG(P)52:2</b> | 34880098 | 28732508 | 49577680 | 95633580 | 1.08E+08 | 17262080 |
| <b>TG(P)54:4</b> | 18268936 | 20794432 | 26326535 | 62539575 | 72408605 | 17324039 |
| <b>PS 46:7</b>   | 763106.6 | 678942.8 | 518796.8 | 582353.3 | 426493.6 | 1904887  |
| <b>PS 46:6</b>   | 1296162  | 1880048  | 1090933  | 470966.2 | 213034.3 | 79518.09 |
| <b>PS 46:2</b>   | 18522654 | 13434735 | 12089229 | 13393643 | 11041348 | 2638224  |
| <b>PS 46:0</b>   | 32257004 | 14633258 | 8448462  | 6605371  | 5467906  | 20112193 |
| <b>PS 45:1</b>   | 1500930  | 683639   | 413447.1 | 459487.5 | 344756.5 | 269747.5 |
| <b>PS 44:9</b>   | 20060807 | 16354061 | 8770291  | 3628209  | 1868976  | 4196127  |
| <b>PS 44:8-2</b> | 38373573 | 53313963 | 31896282 | 10303181 | 10587233 | 11305113 |
| <b>PS 44:7</b>   | 7568299  | 5700248  | 6440171  | 3790206  | 2143706  | 14428835 |
| <b>PS 44:6</b>   | 21912818 | 35713852 | 20211290 | 11551559 | 6778257  | 2954807  |
| <b>PS 44:3</b>   | 18974546 | 21987668 | 20344007 | 15590920 | 12676683 | 666690.1 |
| <b>PS 44:2</b>   | 38907401 | 33820755 | 38496694 | 41049582 | 36563393 | 5395135  |
| <b>PS 44:1</b>   | 89347484 | 58130792 | 52476948 | 59063174 | 54969519 | 19596531 |
| <b>PS 43:1</b>   | 2292436  | 1174463  | 1025568  | 1002475  | 769280.5 | 328828.4 |
| <b>PS 42:6</b>   | 34070864 | 27277462 | 35285935 | 13093542 | 9981029  | 1.77E+08 |
| <b>PS 42:3</b>   | 13482393 | 21687927 | 15308444 | 10063116 | 7428134  | 341832.6 |
| <b>PS 42:1</b>   | 2.18E+08 | 2.06E+08 | 1.81E+08 | 1.89E+08 | 1.68E+08 | 1.92E+08 |
| <b>PS 42:0</b>   | 7541845  | 2932839  | 3224329  | 3226841  | 5300596  | 2690047  |
| <b>PS 41:7</b>   | 25969611 | 38889900 | 24524750 | 19183709 | 13672162 | 3195367  |
| <b>PS 41:3</b>   | 3794664  | 6438012  | 5634570  | 5323156  | 4107784  | 63967.08 |
| <b>PS 41:0</b>   | 1361570  | 1245357  | 1064608  | 835545   | 1032292  | 1383612  |
| <b>PS 40:1-2</b> | 39467733 | 43025268 | 33115421 | 31438411 | 39292733 | 7038240  |
| <b>PS 40:1-1</b> | 2.47E+09 | 2.27E+09 | 2.09E+09 | 2.17E+09 | 2.06E+09 | 1.13E+09 |
| <b>PS 40:0</b>   | 1.21E+09 | 1.27E+09 | 1.07E+09 | 1.03E+09 | 9.93E+08 | 8.4E+08  |

---

|                  |          |          |          |          |          |          |
|------------------|----------|----------|----------|----------|----------|----------|
| <b>PS 39:7</b>   | 5239295  | 5942232  | 2874065  | 2715501  | 3036421  | 1362270  |
| <b>PS 39:5-1</b> | 13694381 | 9671790  | 8506059  | 4546264  | 5793471  | 1020364  |
| <b>PS 39:3</b>   | 1344017  | 2472519  | 1474446  | 1895086  | 976115.9 | 137261.5 |
| <b>PS 39:2</b>   | 12311099 | 17266649 | 28872557 | 35539611 | 53409200 | 6250956  |
| <b>PS 39:1</b>   | 92916906 | 1.09E+08 | 86225887 | 84373728 | 75026244 | 13800348 |
| <b>PS 39:0</b>   | 49125841 | 72519627 | 59734622 | 47899483 | 39814378 | 11009001 |
| <b>PS 38:0</b>   | 2.97E+09 | 3.04E+09 | 2.77E+09 | 2.84E+09 | 2.74E+09 | 1.29E+09 |
| <b>PS 37:6</b>   | 4963449  | 4489964  | 2921385  | 2135894  | 1914556  | 65769.57 |
| <b>PS 37:3</b>   | 9206942  | 12814798 | 11620842 | 15032501 | 14430089 | 1467846  |
| <b>PS 36:8</b>   | 1130795  | 1022461  | 952853   | 934754.4 | 714104.2 | 788214.3 |
| <b>PS 36:1-1</b> | 41666671 | 36237723 | 39621159 | 76598356 | 69509209 | 4820228  |
| <b>PS 36:0-1</b> | 1.08E+08 | 1.22E+08 | 88196892 | 48978601 | 42858946 | 8921634  |
| <b>PS 35:0</b>   | 1.86E+08 | 1.73E+08 | 1.74E+08 | 1.62E+08 | 1.79E+08 | 1.4E+08  |
| <b>PS 34:1-1</b> | 16429658 | 6569865  | 14326351 | 9740151  | 5573741  | 15580665 |
| <b>PS 33:0</b>   | 2.28E+08 | 1.91E+08 | 1.67E+08 | 1.01E+08 | 1.16E+08 | 91125300 |
| <b>PS 31:0</b>   | 40250343 | 15654756 | 15287437 | 11947404 | 10584435 | 6020711  |
| <b>PS 30:4</b>   | 2709215  | 3229921  | 3284887  | 3479674  | 3003031  | 3092843  |
| <b>PI 36:0-2</b> | 11273152 | 10335913 | 5979934  | 3662885  | 2491828  | 887782.6 |
| <b>PI 31:1</b>   | 5114314  | 4982897  | 2075791  | 2939415  | 2318806  | 360302.9 |
| <b>PG 44:1</b>   | 6320163  | 4277371  | 4054606  | 5644030  | 5078766  | 1560726  |
| <b>PG 43:4</b>   | 44942659 | 55077868 | 39923988 | 24884190 | 17854694 | 1263002  |
| <b>PG 42:5</b>   | 2565332  | 2661005  | 2452602  | 1987914  | 3684190  | 213817.6 |
| <b>PG 42:2</b>   | 225256.8 | 230298.6 | 401584.8 | 325624   | 334313.2 | 169355.1 |
| <b>PG 42:1</b>   | 4771024  | 5203323  | 5793216  | 6778976  | 6540820  | 4426659  |
| <b>PG 41:5</b>   | 6672983  | 2666908  | 1847683  | 1216859  | 353063.8 | 1427510  |

---

|                  |          |          |          |          |          |          |
|------------------|----------|----------|----------|----------|----------|----------|
| <b>PG 41:3</b>   | 42711741 | 46814696 | 30804374 | 22901993 | 20838249 | 1455696  |
| <b>PG 41:2</b>   | 53457418 | 40262389 | 48498407 | 77404558 | 67210011 | 4755108  |
| <b>PG 41:1</b>   | 70667846 | 54135144 | 53631883 | 58460736 | 56245470 | 22686659 |
| <b>PG 41:0</b>   | 6008507  | 4689768  | 4780433  | 6128437  | 5478435  | 1040355  |
| <b>PG 40:5</b>   | 3899053  | 3348792  | 3507008  | 4017351  | 4230259  | 249169.2 |
| <b>PG 40:4</b>   | 24432161 | 33585376 | 41544503 | 54550624 | 62058804 | 5994210  |
| <b>PG 40:3</b>   | 19180765 | 23444974 | 34952082 | 55500153 | 68416186 | 8414001  |
| <b>PG 40:2</b>   | 3020705  | 5615663  | 6815763  | 9411423  | 10977378 | 1226208  |
| <b>PG 40:1</b>   | 27120614 | 20219821 | 18924983 | 17327285 | 18148510 | 10702073 |
| <b>PG 40:0</b>   | 2953738  | 2480340  | 2619798  | 3028852  | 2809365  | 3153174  |
| <b>PG 39:2</b>   | 552356.1 | 1052363  | 719061.2 | 655419.5 | 684120.6 | 157758.3 |
| <b>PG 39:0</b>   | 663909.2 | 714246.9 | 707610.7 | 699300.1 | 722057.9 | 2134406  |
| <b>PG 38:5-3</b> | 6232084  | 2822042  | 2589054  | 2734849  | 1701600  | 311158.2 |
| <b>PG 38:3-1</b> | 4146663  | 2732374  | 3307881  | 5733939  | 3756075  | 1615570  |
| <b>PG 38:2</b>   | 7526227  | 3838697  | 9161703  | 7741227  | 5309028  | 10110854 |
| <b>PG 38:1</b>   | 1943334  | 1532828  | 1383640  | 1030757  | 1298667  | 8240858  |
| <b>PG 38:0-2</b> | 59176048 | 54007412 | 47927338 | 44868141 | 39931079 | 6055732  |
| <b>PG 38:0-1</b> | 2912312  | 2081749  | 1068475  | 500262.2 | 743622.5 | 694713.5 |
| <b>PG 37:3</b>   | 9885020  | 6765563  | 6389732  | 9126875  | 9223483  | 254635.8 |
| <b>PG 37:2</b>   | 4185364  | 1058743  | 1964989  | 2213090  | 915430.9 | 6450896  |
| <b>PG 37:1</b>   | 8615443  | 3429400  | 10247083 | 9738199  | 3464793  | 25027422 |
| <b>PG 36:2-1</b> | 2.19E+08 | 1.12E+08 | 1.17E+08 | 1.37E+08 | 1E+08    | 3.12E+08 |
| <b>PG 35:1</b>   | 8813477  | 6164628  | 4014543  | 3232876  | 1845998  | 861593.9 |
| <b>PG 35:0</b>   | 47276421 | 31675219 | 39348889 | 50761608 | 52885782 | 5907756  |
| <b>PG 33:1</b>   | 449457.2 | 503327.4 | 419679.6 | 369529.6 | 108485   | 350413.7 |



---

**PG 32:2**

5722555

2287695

2609628

2055149

2685466

436882.1

---

**Table S2. shRNA target sequences.**

|            |                             |
|------------|-----------------------------|
| shLuc      | 5'-CGTACGCGGAATACTTCGA-3'   |
| shChka_1   | 5'-GAATTTGGGTACATGGAATAT-3' |
| shChka_2   | 5'-GTTACTTGACTACATTCCAAA-3' |
| shChkb_1   | 5'-GTGAGTGGGTTTATGATTATA-3' |
| shChkb_2   | 5'-CCCAGCTTTACGGAGTGTTTC-3' |
| shPcyt1_1  | 5'-CCTGTGAGAGTTTATGCGGAT-3' |
| shPcyt1_2  | 5'-CCCGAGAGTTCATTGGAAGTT-3' |
| shEtnk1_1  | 5'-TTGACATGACTGACTACTTTG-3' |
| shEtnk1_2  | 5'-CGACCTGTTGTGTAAGAATAT-3' |
| shEtnk2_1  | 5'-CGCCTTAGAAATGGCTAAGAT-3' |
| shEtnk2_2  | 5'-CGGCATCACCAACAAGCTATT-3' |
| shPcyt2_1  | 5'-GCTCACACAATTCCAAAGGAA-3' |
| shPcyt2_2  | 5'-CTGCTATGACATGGTGCATTA-3' |
| shPtdss1_1 | 5'-GCCTTGTTGATCCGTAGTTAT-3' |
| shPtdss1_2 | 5'-CCTGAACTTCGAGCAGGTTAA-3' |
| shPtdss2_1 | 5'-CAAGCTAAAGACGGGCCATTT-3' |
| shPtdss2_2 | 5'-CTGTCCCTGAAGACATATAAG-3' |
| shPebp1_1  | 5'-GTGGTCAACATGAAGGGTAAT-3' |
| shPebp1_2  | 5'-CCCTCTCATTGGGAGTTCTTA-3' |

**Table S3. Primers for qRT-PCR.**

|                | Forward                               | Reverse                          |
|----------------|---------------------------------------|----------------------------------|
| <i>mGAPD</i>   | 5'-                                   | 5'-                              |
| <i>H</i>       | AACTTTGGCATTGTGGAAGGGCTC<br>A-3'      | TTGGCAGCACCAGTGGATGCAGGG<br>A-3' |
| <i>mChka</i>   | 5'-CAGGGGTGGTCTCAGTAACAT-3'           | 5'-CGCAAGAGCACTTTCCGAG-3'        |
| <i>mChkb</i>   | 5'-AGGATGCTAAGTGCCCAGAG-3'            | 5'-TCACGGGACAAACGCTCAG-3'        |
| <i>mPcyt1</i>  | 5'-<br>GATGCACAGAGTTCAGCTAAAGT-<br>3' | 5'-TGGCTGCCGTAAACCAACTG-3'       |
| <i>mEtnk1</i>  | 5'-CTGTTACAGATGGGATCACAA-<br>3'       | 5'-CGCGGAACTTTTCACTTCCTC-3'      |
| <i>mEtnk2</i>  | 5'-TTCAGCGTCACGGTGGAAC-3'             | 5'-GTGATGCCGTCTTTGAAGCG-3'       |
| <i>mPcyt2</i>  | 5'-CGATGGCTGCTATGACATGGT-3'           | 5'-GCCCTTATGCTTGGCAATCT-3'       |
| <i>mPtdss1</i> | 5'-GCAGGACTCTGAGCAAGGATG-3'           | 5'-GGCGAAGTACATGAGGCTGAT-3'      |
| <i>mPtdss2</i> | 5'-TGGGACCATTGGATCATGGAC-3'           | 5'-CCACTCTAATGTTTTGCTTGCC-3'     |
| <i>mCdh1</i>   | 5'-CAGCCTTCTTTTCGGAAGACT-3'           | 5'-GGTAGACAGCTCCCTATGACTG-<br>3' |
| <i>mEpcam</i>  | 5'-GCGGCTCAGAGAGACTGTG-3'             | 5'-CCAAGCATTTAGACGCCAGTTT-3'     |
| <i>mKrt7</i>   | 5'-AGGAGATCAACCGACGCAC-3'             | 5'-GTCTCGTGAAGGGTCTTGAGG-3'      |
| <i>mOcln</i>   | 5'-<br>TTGAAAGTCCACCTCCTTACAGA-3'     | 5'-CCGGATAAAAAGAGTACGCTGG-<br>3' |
| <i>mSnail</i>  | 5'-CTTGTGTCTGCACGACCTGT -3'           | 5'-CTTCACATCCGAGTGGGTTT-3'       |
| <i>mTwist1</i> | 5'-CCGGAGACCTAGATGTCATTG-3'           | 5'-ACGCCCTGATTCTTGTGAA-3'        |
| <i>mZeb1</i>   | 5'-GCTGGCAAGACAACGTGAAAG-             | 5'-GCCTCAGGATAAATGACGGC-3'       |

|                    |                             |                                |
|--------------------|-----------------------------|--------------------------------|
|                    | 3'                          |                                |
| <i>mPebp1</i>      | 5'-CCAGCAGCATTTTCATGGGAC-3' | 5'-TGGTGCCACTCCCTGAATTTG-3'    |
| <i>hGAPDH</i>      | 5'-GGAGCGAGATCCCTCCAAAAT-3' | 5'-GCTGTTGTCATACTTCTCATGG-3'   |
| <i>hCDH1</i>       | 5'-CGAGAGCTACACGTTACGG-3'   | 5'-GGGTGTCGAGGGAAAAATAGG-3'    |
| <i>hSNAI1</i>      | 5'-TCGGAAGCCTAACTACAGCGA-3' | 5'-AGATGAGCATTGGCAGCGAG-3'     |
| <i>hETNK1</i>      | 5'-GTGCCCAAGCTGAACGTCA-3'   | 5'-TCACCAGGACTACATCCTCCA-3'    |
| <i>hETNK2</i>      | 5'-GCCCCGGCTTTTCAGGTTAAT-3' | 5'-GGCTGGGGTTGATCTCGTT-3'      |
| <i>hPCYT2</i>      | 5'-TGTCCACCACAGACCTCGT-3'   | 5'-ATACTCCCGGTACTIONCAGAGGA-3' |
| <i>hPEBP1</i>      | 5'-CCTGCAAGAAGTGGACGAG-3'   | 5'-ACCAAGGTGTAGAGCTTCCCT-3'    |
| <i>hCHKA</i>       | 5'-TGGTTCTGGAGAGCGTTATGT-3' | 5'-CATTTTCTCGGCGATTTCTGC-3'    |
| <i>hCHKB</i>       | 5'-GGCTTGCAGCAGTCTAAGTG-3'  | 5'-GGCACCATTGGTAGGCTCG-3'      |
| <i>hPCYT1</i><br>A | 5'-CTCTGATGCAAGCGAAGAACC-3' | 5'-ATCACCGTGAAGCCTTTGAAG-3'    |
| <i>hPCYT1</i><br>B | 5'-TGACATTCCGTATTCTCTGCT-3' | 5'-TCTCTGCGTTGGAACGAACAT-3'    |
| <i>hPTDSS1</i>     | 5'-GGTCCGTTCACTCGACCTC-3'   | 5'-TGTGGCGTATCGAAGATTTGG-3'    |
| <i>hPTDSS2</i>     | 5'-CACCAAGAGAGGTATTGTGGC-3' | 5'-AATGGCCCGTCTTTAGCTTGT-3'    |

**Table S4. Primers for ChIP-qPCR.**

|                                | Forward                         | Reverse                        |
|--------------------------------|---------------------------------|--------------------------------|
| S1 ( <i>Snail</i> , -894,-814) | 5'-GCATGTGGCCCGTAGCAC-3'        | 5'-<br>CGGAGGCCAGTGACTGAATT-3' |
| S2 ( <i>Snail</i> , -683,-521) | 5'-<br>GGGACCCGAAATCCCCTAAAA-3' | 5'-GGAGGACGCCGAGGCTGTT-<br>3'  |
| S3 ( <i>Snail</i> , -115,+19)  | 5'-GGGTCTGACTCAGTTACCCC-3'      | 5'-GGGTCTGACTCAGTTACCCC-<br>3' |
| T1 ( <i>Twist1</i> , -147,-47) | 5'-ATCCCGCCTCCCTGCGTCC-3'       | 5'-TAGAGCAGAGGAGCGGGGC-<br>3'  |
| Negative Control (NC)          | 5'-AGACCTCACCTTGA ACTTAC-3'     | 5'-GACCACCTTATCCGAATGT-3'      |
